1 **Full title:** Genomic landscape of the global oak phylogeny  
2 **Short title:** Genomic landscape of the global oak phylogeny

3 Andrew L. Hipp<sup>1,2</sup>, Paul S. Manos<sup>3</sup>, Marlene Hahn<sup>1</sup>, Michael Avishai<sup>4</sup>, Cathérine Bodénès<sup>5</sup>, Jeannine  
4 Cavender-Bares<sup>6</sup>, Andrew Crowl<sup>3</sup>, Min Deng<sup>7</sup>, Thomas Denk<sup>8</sup>, Sorel Fitz-Gibbon<sup>9</sup>, Oliver Gailing<sup>10</sup>,  
5 M. Socorro González-Elizondo<sup>11</sup>, Antonio González-Rodríguez<sup>12</sup>, Guido W. Grimm<sup>13</sup>, Xiao-Long  
6 Jiang<sup>7</sup>, Antoine Kremer<sup>5</sup>, Isabelle Lesur<sup>5</sup>, John D. McVay<sup>3,14</sup>, Christophe Plomion<sup>5</sup>, Hernando  
7 Rodríguez-Correa<sup>12</sup>, Ernst-Detlef Schulze<sup>15</sup>, Marco C. Simeone<sup>16</sup>, Victoria L. Sork<sup>9</sup>, Susana Valencia-  
8 Avalos<sup>17</sup>

9 <sup>1</sup> The Morton Arboretum, Lisle IL 60532-1293, USA

10 <sup>2</sup> The Field Museum, Chicago IL 60605, USA

11 <sup>3</sup> Duke University, Durham NC 27708, USA

12 <sup>4</sup> Previously of The Hebrew University of Jerusalem, Botanical Garden, Jerusalem, Israel

13 <sup>5</sup> INRA, UMR1202 BIOGECO, Cestas F-33610, France

14 <sup>6</sup> University of Minnesota, Minneapolis MN 55455, USA

15 <sup>7</sup> Shanghai Chenshan Plant Science Research Center, Chinese Academy of Sciences, Shanghai 201602,  
16 China

17 <sup>8</sup> Swedish Museum of Natural History, 10405 Stockholm, Sweden

18 <sup>9</sup> University of California, Los Angeles, Los Angeles CA 90095, USA

19 <sup>10</sup> Büsgen-Institute, Georg-August-University Göttingen, D-37077 Göttingen, Germany

20 <sup>11</sup> CIIDIR Unidad Durango, Instituto Politécnico Nacional, Durango, México

21 <sup>12</sup> Escuela Nacional de Estudios Superiores Unidad Morelia, Universidad Nacional Autónoma de  
22 México

23 <sup>13</sup> Unaffiliated, 45100 Orléans, France; <http://orcid.org/0000-0003-0674-3553>

24 <sup>14</sup> Current affiliation : Division of Plant Industry, Florida Department of Agriculture and Consumer  
25 Services, Gainesville FL 32608, USA

26 <sup>15</sup> Max Planck Institute for Biogeochemistry, Hans-Knoell-Str. 10, 07745 Jena, Germany

27 <sup>16</sup> Università degli Studi della Tuscia, Viterbo, Italy

28 <sup>17</sup> Herbario de la Facultad de Ciencias, Departamento de Biología Comparada, Universidad Nacional  
29 Autónoma de México, Circuito Exterior, s.n., Ciudad Universitaria, Coyoacán, CP 04510, México City,  
30 México

31 **Author for correspondence:** Andrew L. Hipp / Tel: +1 630 725 2094 / Email: [ahipp@mortonarb.org](mailto:ahipp@mortonarb.org)

32 **Total word count** 6,474

33 • Introduction: 559

34 • Materials and Methods: 1,291

35 • Results: 1,770

36 • Discussion: 2,770

37 • Acknowledgements: 84

38

39 Tables: 1

40 Figures: 6 [all color]

41 **Summary**

- 42 • The tree of life is highly reticulate, with the history of population divergence buried amongst  
43 phylogenies deriving from introgression and lineage sorting. In this study, we test the  
44 hypothesis that there are regions of the oak (*Quercus*, Fagaceae) genome that are broadly  
45 informative about phylogeny and investigate global patterns of oak diversity.
- 46 • We utilize fossil data and restriction-site associated DNA sequencing (RAD-seq) for 632  
47 individuals representing ca. 250 oak species to infer a time-calibrated phylogeny of the world's  
48 oaks. We use reversible-jump MCMC to reconstruct shifts in lineage diversification rates,  
49 accounting for among-clade sampling biases. We then map the > 20,000 RAD-seq loci back to  
50 a recently published oak genome and investigate genomic distribution of introgression and  
51 phylogenetic support across the phylogeny.
- 52 • Oak lineages have diversified among geographic regions, followed by ecological divergence  
53 within regions, in the Americas and Eurasia. Roughly 60% of oak diversity traces back to four  
54 clades that experienced increases in net diversification due to climatic transitions or ecological  
55 opportunity.
- 56 • The support we find for the phylogeny contrasts with high genomic heterogeneity in  
57 phylogenetic signal and introgression. Oaks are phylogenomic mosaics, and their diversity may  
58 in fact depend on the gene flow that shapes the oak genome.

59  
60 **Keywords:** Diversification rates, Genomic mosaicism, Oaks, Introgression, Phylogenomics, *Quercus*,  
61 Restriction-site associated DNA sequencing (RAD-seq), Tree diversity

62  
63

## 64 **Introduction**

65 The tree of life exhibits reticulation from its base to its tips (Folk *et al.*, 2018; Quammen, 2018). Oaks  
66 (*Quercus* L., Fagaceae) are no exception (Hipp, 2018), and in fact the genus is rife with case-studies in  
67 localized gene flow (e.g. Hardin, 1975; Whittemore & Schaal, 1991; McVay *et al.*, 2017a; Kim *et al.*,  
68 2018), and ancient introgression (Crowl *et al.*, In review; McVay *et al.*, 2017b; Kim *et al.*, 2018). Oaks  
69 have in fact been held up as a paradigmatic syngameon (Hardin, 1975; Van Valen, 1976; Dodd &  
70 Afzal-Rafii, 2004; Cannon & Scher, 2017; Boecklen, 2017), a system of interbreeding species in which  
71 incomplete reproductive isolation may facilitate adaptive gene flow and species migration (Petit *et al.*,  
72 2003; Dodd & Afzal-Rafii, 2004). The oak genome (Plomion *et al.*, 2018) consequently tracks  
73 numerous unique species-level phylogenetic histories that result from lineage sorting and differential  
74 rates of introgression (Anderson, 1953; Eaton *et al.*, 2015; McVay *et al.*, 2017b; Edelman *et al.*, 2018).  
75 Oak genomes are mosaics of disparate phylogenetic histories (cf. Pääbo, 2003). Given the prevalence  
76 of hybridization in trees globally (Petit & Hampe, 2006; Cannon & Lerda, 2015), understanding how  
77 these stories line up with one another, and whether there are regions of the genome that track a  
78 common story, is essential to understanding the prevalence of adaptive gene flow and the phylogenetic  
79 history of forest trees.

80 Restriction-site associated DNA sequencing (RAD-seq; Miller *et al.*, 2007a,b; Lewis *et al.*,  
81 2007; Baird *et al.*, 2008; Ree & Hipp, 2015) has revolutionized our understanding of oak phylogeny in  
82 the past five years (Jiang *et al.*, In review; Hipp *et al.*, 2014, 2018; Cavender-Bares *et al.*, 2015; Eaton  
83 *et al.*, 2015; Hipp, 2017; Fitz-Gibbon *et al.*, 2017; Pham *et al.*, 2017; Ortego *et al.*, 2018; Deng *et al.*,  
84 2018; Kim *et al.*, 2018). Its ties to the genome, however, have not been fully exploited because of the  
85 lack of an assembled genome. While earlier studies have explored the effects of gene identity on  
86 phylogenetic informativeness (Hipp *et al.*, 2014) and genomic heterogeneity in phylogenetic vs.  
87 introgressive signals (McVay *et al.*, 2017b,a), they have not had access to the oak genome sequence.  
88 As a consequence, we do not understand the distribution of genomic breakpoints between introgressive  
89 and divergent histories. Moreover, no studies to date have brought together a comprehensive sampling  
90 of taxa to investigate the history of diversification across the genus.

91 In this paper, we integrate data from the recently published *Quercus robur* genome (Plomion *et*  
92 *al.*, 2016, 2018) with previously published RAD-seq data for 427 sequenced oak individuals across the  
93 tree of life and new RAD-seq data for an additional 205 individuals to investigate the global oak  
94 phylogenomic mosaic for approximately 60% of the world's *Quercus* species. We test the hypothesis  
95 that there are regions of the genome that are uniformly informative about *Quercus* phylogeny, regions  
96 that make oak lineages what they are. Furthermore, using a time-calibrated one-tip-per species tree

97 novel to this study for ca. 60% of known species, we test the hypothesis that the high diversity of oaks  
98 in Mexico and eastern China is a consequence of high diversification rates. Finally, we show that the  
99 consensus of the evolutionary histories of more than 20,000 RAD-seq loci matches our understanding  
100 of oak evolution based on morphological information from extant and fossil species in spite of broadly  
101 conflicting individual locus genealogies.

102

## 103 **Materials and Methods**

### 104 *Previously published RAD-seq and new RAD-seq: sequencing and clustering*

105 Data from previously published RAD-seq phylogenies were analyzed alongside new RAD-seq data for  
106 a total of 632 individuals (Table S1). RAD-seq data were generated as described in the previous  
107 studies. New data were from library preparations conducted at Floragenex, Inc. (Portland, OR, USA)  
108 following the methods of Baird *et al.* (2008) with *Pst*I, barcoded by individual, and sequenced on an  
109 Illumina Genome Analyzer Iix at Floragenex, or an Illumina HiSeq 2500 or HiSeq 4000 at the  
110 University of Oregon Genomic Facility.

111 FASTQ files were demultiplexed and filtered to remove sequences with more than 5 bases of  
112 quality score < 20 and assembled into loci for phylogenetic analysis using ipyrad 0.7.23 (Eaton, 2014)  
113 at 85% sequence similarity. Consensus sequences for each individual for each locus were then  
114 clustered across individuals, retaining loci present in at least 4 individuals and possessing a maximum  
115 of 20 SNPs and 8 indels across individuals. The dataset was filtered to loci with a minimum of 15  
116 individuals each, for a total of 58,985 loci. Data were imported into R using the RADami package  
117 (Hipp *et al.*, 2014) for downstream analysis.

118 RAD-seq loci were mapped back to the latest version of the *Quercus robur* haploid genome  
119 (haplome 2.3; <https://urgi.versailles.inra.fr/Data/Genome/Genome-data-access>) (Plomion *et al.*, 2018).  
120 The oak genome is made of 12 pseudomolecules (*i.e.* chromosomes) and a set of 538 unassigned  
121 scaffolds. Mapping was performed using Blast+ 2.8.1 (Camacho *et al.*, 2009). We filtered alignments  
122 based on expect (E) values ( $E\text{-value} \leq 10^{-5}$ ), alignment length ( $\geq 80\%$  of the length of the loci) and  
123 percent identity ( $\geq 80\%$ ). For each locus, the best alignment was kept. All sequence data analyzed in  
124 this paper are available as FASTQ files from NCBI's Short Read Archive (Table S1), and aligned loci  
125 and additional data and scripts for all analysis are available from [https://github.com/andrew-](https://github.com/andrew-hipp/global-oaks-2019)  
126 [hipp/global-oaks-2019](https://github.com/andrew-hipp/global-oaks-2019). Analysis details are in the Supplement (Methods S1).

127

128 *Phylogenetic analysis*

129 Maximum likelihood phylogenetic analyses were conducted in RAxML v8.2.4 (Stamatakis, 2014)  
130 using the GTRCAT implementation of the general time reversible model of nucleotide evolution  
131 (Stamatakis, 2006), with branch support assessed using RELL bootstrapping (Minh *et al.*, 2013). For  
132 the phylogeny including all tips (Fig. S1), analysis was unconstrained, and we used the taxonomic  
133 disparity index (TDI) of Pham *et al.* (2016) to identify the extent of non-monophyly by species.  
134 Topology within the white oaks of sections *Ponticae*, *Virentes*, and *Quercus* (hereafter in the paper  
135 “white oaks *s.l.*,” contrasted with “white oaks *s.str.*” for just section *Quercus*) was observed to be at  
136 odds with previous close studies (Crowl *et al.*, In review; McVay *et al.*, 2017b,a; Hipp *et al.*, 2018) that  
137 have shown the topology of the white oaks *s.l.* to be sensitive to taxon and locus sampling. For dating,  
138 samples were pruned to one sample per named species, favoring samples with the most loci, except for  
139 species in which variable position of samples from different populations was deemed to represent  
140 cryptic diversity, in which case more than one exemplar was retained. The singletons tree was  
141 estimated in RAxML using a phylogenetic constraint (Manos, 2016; McVay *et al.*, 2017b; Hipp *et al.*,  
142 2018) available in the supplemental methods and supplemental data. The remainder of the tree was  
143 unconstrained and conforms closely to previous topologies.

144 We utilized neighbor-net (Bryant & Moulton, 2004) to visualize overall patterns of molecular  
145 genetic diversity. Likelihood-based methods (e.g., Solís-Lemus & Ané, 2016; Solís-Lemus *et al.*, 2017;  
146 Wen *et al.*, 2018; Zhang *et al.*, 2018) that we have utilized on smaller oak datasets (Crowl *et al.*, In  
147 review; Eaton *et al.*, 2015; Hauser *et al.*, 2017; McVay *et al.*, 2017b,a) proved computationally  
148 intractable for the current dataset. Consequently, we utilized a splits network inferred with SPLITSTREE  
149 v. 14.3 (Huson & Bryant, 2006) based on the maximum-likelihood (GTR+gamma) pairwise distance  
150 matrix estimated in RAxML and the same datasets utilized for the singletons tree. Full phylogenetic  
151 analysis details are in the Supplement (Methods S1).

152

### 153 *Calibration of singletons tree*

154 Branch lengths on the tree were inferred using penalized likelihood under both a relaxed model, where  
155 rates are uncorrelated among branches (Paradis, 2013), and a correlated rates model (which  
156 corresponds to the penalized likelihood approach of Sanderson, 2002), as implemented in the chronos  
157 function of ape v 5.1 (Paradis *et al.*, 2004) of R v 3.4.4 (“Someone to Lean On”) (R-Development-  
158 Core-Team, 2004). Nodes were calibrated in two different ways, either using eight fossil calibrations,  
159 corresponding to the crown of the genus and seven key clades (Fig. S2a; Table 1), or more  
160 conservatively as stem ages, using a subset of five fossils (Fig. S2b; Table 1). The two calibrations  
161 (referred to as the ‘crown calibration’ and ‘stem calibration’ respectively) bracket what we consider to

162 be plausible age ranges for the tree. A separate estimate of the best fit  $\lambda$  for the correlated clock model  
163 was made using cross-validation as implemented in the `chronopl` function of `ape`, and that value of  $\lambda$   
164 was used for both the relaxed and correlated clocks. Comparison of  $\Delta$ IC was used to identify the best  
165 fit model for each value of  $\lambda$ . Analysis details are in the Supplement (Methods S1)

166 Transitions in lineage diversification rates were estimated using the speciation-extinction model  
167 implemented in Bayesian Analysis of Macroevolutionary Mixtures (BAMM) (Rabosky, 2014); the  
168 BAMMtools R package was used for configuration and analysis of MCMC. Priors were set using the  
169 `setBAMMpriors` function. Analyses were run for 4E06 generations, saving every 2000 generations,  
170 with four chains per MCMC analysis. To visualize changes in standing diversity over time for the  
171 different sections, we plotted lineage through time (LTT) plots by section against  $\delta^{18}\text{O}$  levels reported  
172 in Zachos *et al.* (2001) as a temperature proxy. Analysis details are in the Supplement (Methods S1).

173

#### 174 *Investigating the genomic landscape of oak evolutionary history*

175 Introgressive status of loci for two known introgression events involving the Eurasian white oaks  
176 (McVay *et al.*, 2017b) and the western North American lobed-leaf white oaks (McVay *et al.*, 2017a)  
177 was assessed by calculating the likelihood of phylogenies inferred for each locus under the constraint  
178 of the inferred divergence history (species tree) and the gene flow history at odds with that divergence  
179 history, as inferred in the studies cited above. These two cases are of particular interest because they  
180 are well studied, and lineage sorting has been ruled out in the above studies as an explanation of  
181 incongruence between the alternative topologies we test. Position of loci with a relative support of at  
182 least 2 log-likelihood points for one history relative to the other were mapped back to the *Quercus*  
183 *robur* genome (Plomion *et al.*, 2018). Analysis details are in the Supplement (Methods S1).

184 To identify relative phylogenetic informativeness of loci, two tests were conducted based on the  
185 singletons tree. First, the ML topology was estimated in RAxML for each of 2,762 mapped, rootable  
186 loci of at least 10 individuals that resolved at least one bipartition. Overall, locus trees resolved an  
187 average of 4.48 (+/- 1.83 s.d.) nodes, with a maximum of 15 and a median of 4. These were compared  
188 with the total-evidence tree using quartet similarities using the `tqDist` algorithm (Sand *et al.*, 2014) in  
189 the `Quartet` package (Smith, 2019). We used as our similarity metric the number of quartets resolved  
190 the same way for both the locus tree and the whole singletons tree divided by the sum of quartets  
191 resolved the same or differently. Then, these same locus trees were mapped back to the singletons tree  
192 using `phyparts` (Smith *et al.*, 2015), which identifies for all branches on a single tree how many  
193 individual locus trees support or reject that branch. We tested for genomic autocorrelation in



194 phylogenetic signal using spline correlograms (Bjørnstad & Falck, 2001; Bjørnstad, 2008), with each  
195 chromosome tested independently. Analysis details are in the Supplement (Methods S1).

196

## 197 **Results**

### 198 *RAD-seq data matrix*

199 RAD-seq library preps and sequencing yielded a mean of  $1.685E06 \pm 1.104E06$  (s.d.) raw reads per  
200 individual; of these, > 99.8% ( $1.683E06 \pm 1.104E06$ ) passed quality filters. The total number of  
201 clusters per individual prior to clustering across individuals was  $101,895 \pm 58,810$ , with a mean depth  
202 of  $17.2 \pm 11.2$  sequences per individual and cluster. Clusters with more than 10,000 sequences per  
203 individual were discarded. Mean estimated heterozygosity by individual was  $0.0135 \pm 0.0027$ , and  
204 sequencing error rate was  $0.0020 \pm 0.0004$ . After clustering, a total of 49,991 loci were present in at  
205 least 15 individuals each. Each individual in the final dataset possesses  $6.48\% \pm 2.48\%$  of all clustered  
206 loci. The total data matrix is  $4.352 \times 10^6$  aligned nucleotides in width. The singletons dataset is  
207 composed of 22,432 loci present in at least 15 individuals, making up a dataset of  $1.970 \times 10^6$  aligned  
208 nucleotides.

209

### 210 *All-tips tree*

211 The all-tips tree (Fig. S1) comprises 246 named *Quercus* species, of which 99 have a single sample.  
212 The remaining 147 species have an average of  $3.54 \pm 2.72$  (s.d.) samples each. 97 of the 147 species  
213 with more than one sample cohere for all samples, and only 13 have a taxonomic disparity index (TDI,  
214 Pham *et al.*, 2016) of 10 or more (Table S3), suggesting taxonomic problems beyond difficulties  
215 distinguishing very close relatives. All but four are Mexican species or species split between the  
216 southwestern U.S. and Mexico (see Discussion). Of the others, the largest TDI values are for *Q. stellata*  
217 and *Q. parvula* of North America, *Q. hartwissiana* and *Q. petraea* of western Eurasia, all with a  
218 complicated taxonomic history.

219 The topology of the all-tips tree closely matches previous analyses based on fewer taxa (McVay  
220 *et al.*, 2017b; Hipp *et al.*, 2018; Deng *et al.*, 2018) for all sections except sections *Quercus* and  
221 *Virentes*. Unlike previous analyses, the all-tips topology embeds the long-branched section *Virentes*  
222 within section *Quercus*, sister to a clade comprising the SW US and Mexican clade and the *Stellatae*  
223 clade. This appears to be an artefact of clustering, as prior analyses of the same taxa do not reveal this  
224 topology, and unconstrained analysis of these taxa also recovers this aberrant topology. As a  
225 consequence, we consider the large-scale topology of the white oaks *s.l.* not to be reliable in the all-tips

226 tree, and as this topology is well resolved in prior works (McVay *et al.*, 2017b,a), we constrain the  
227 singletons topology as described in the methods section.

228

### 229 *Topology and timing of the oak phylogeny*

230 Between the correlated and relaxed models of molecular rate heterogeneity, the correlated rates model  
231 (i.e., the penalized likelihood approach of Sanderson 2002) is consistently favored using  $\Delta$ IC except at  
232  $\lambda$  of 0, when the models are identical (Table S4). Though dating estimates differ little from  $\lambda = 0$  to  $\lambda =$   
233 10 (not shown, but reproducible using code archived for this paper), cross-validation shows lowest  
234 sensitivity of taxon-removal on dating estimates at  $\lambda = 1$ .

235 Analyses with the crown-age calibrations (Fig. 1, S3a) suggest an older origin of most sections than  
236 proposed in prior studies (e.g., Cavender-Bares *et al.*, 2015; Hipp *et al.*, 2018; Deng *et al.*, 2018), in  
237 part because in the current study we had access to a more comprehensive picture of the fossil record in  
238 oaks, including fossils used as age priors that predate those used in earlier studies. Section *Virentes* in  
239 our analysis has a crown age of ca. 30 Ma, whereas Cavender-Bares *et al.* (2015) estimated the crown  
240 age at 11 Ma. Even under the stem-age calibrations (Fig. 1; Fig. S3b, c), we estimate the crown age of  
241 *Virentes* at close to the Oligocene-Miocene boundary (ca. 23 Ma), nearly twice as old as prior  
242 estimates. Sections *Quercus* and *Lobatae* had an Oligocene crown constraint (31 Ma) in our previous  
243 work (Hipp *et al.*, 2018); in the current study, they were constrained to a mid-Eocene origin (45–48  
244 Ma) for the crown calibration, while the stem calibration recovers a late-Eocene origin for the red oaks  
245 (39 Ma) while the white oaks float down to a mid-Oligocene crown age (28 Ma). In the previous study  
246 of section *Cyclobalanopsis*, a minimum age of 33 Ma was set as a constraint at the root of subgenus  
247 *Cerris*, leading to a late Oligocene crown age for section *Cyclobalanopsis* (Deng *et al.*, 2018); by  
248 contrast we recover an early Eocene crown age (38 Ma) for the group under the crown calibration, late  
249 Eocene (36 Ma) under the stem calibration. Given the high fossil density in *Quercus* (Table 1 and  
250 references therein; also reviewed in part in Denk & Grimm, 2009; Grímsson *et al.*, 2015; Denk *et al.*,  
251 2017), the potential for alternative interpretations of their placement, and disparity among alternative  
252 methods for modeling (Paradis, 2013; Donoghue Philip C. J. & Yang Ziheng, 2016), we leave an  
253 investigation of a broader range of dating scenarios to later studies.

254 White oaks *s.str.* are estimated in the crown-calibration analysis to have arrived in Eurasia some  
255 point in the Oligocene, close to the split between the section *Ponticae* sisters, which despite their  
256 morphological similarity appear to have diverged from one another nearly twice as long ago as the  
257 crown age of the Mexican white oaks; under the stem-calibration, the Eurasian white oaks are  
258 approximately half the crown age of the *Ponticae*. By contrast with the two species of sect. *Ponticae*,



259 the Mexican white oak ancestor gave rise to an estimated 80 species in approximately half the time.  
260 The Roburoids had divided into a European and an East Asian clade by the early Miocene under the  
261 crown calibration, the late Miocene under the stem calibration.

262 Under the diversification scenarios implied by both the crown and the stem calibrations (Fig. 1, 2),  
263 there are four relatively recent and nearly simultaneous upticks in diversification: white oaks of Mexico  
264 and Central America; the red oaks of Mexico and Central America; the Eurasian (Roburoid) white  
265 oaks; and the *Glauca*, *Semiserrata*, and *Acuta* clades of section *Cyclobalanopsis*. In addition, the  
266 Eurasian white oaks and the southeastern U.S. white oaks (the *Stellatae* clade) and red oaks (the  
267 *Laurofoliae* clade) show a lesser increase in diversification rate in both analyses, and the clade of  
268 section *Ilex* that includes the Himalayan and Mediterranean species shows an uptick in diversification  
269 rate in the stem calibration. This result is robust to missing taxa, as we find essentially the same clades  
270 increasing in rate even assuming the 40% of missing taxa in our study were missing at random from the  
271 tree (Fig. S3a-c), with the addition of a portion of section *Ilex* and some of the eastern North American  
272 taxa as high-rate clades under the global sampling proportions model.

273

#### 274 *Genomic arrangement of RAD-seq loci*

275 A total of 39,860 loci aligned to at least one position on the oak genome. The 12  
276 “pseudochromosomes” (inferred linkage groups, corresponding to the 12 *Quercus* chromosomes) as  
277 well as 360 scaffolds that did not map to the linkage groups were targeted by these loci. A total of  
278 19,468 loci mapped to a unique position on a scaffold placed to one of the 12 oak genome  
279 pseudochromosomes, an average of  $1,622.3 \pm 575.4$  (s.d.) per chromosomes. Of these,  $31.7\% \pm 8.1\%$   
280 overlapped with the boundaries of a gene model (Fig. 3), despite the fact that only 10.1% of the 716  
281 Mb of the *Quercus robur* genome that fall within the 12 pseudochromosomes fall within the endpoints  
282 of a gene model.

283 For the tests of introgression, 2,422 loci had taxon sampling appropriate to testing for  
284 introgression involving *Q. macrocarpa* and *Q. lobata* (the *Dumosae* alternative topologies); 2,228 were  
285 suitable to testing for introgression involving the Roburoid white oaks and *Q. pontica* (the Roburoid  
286 alternative topologies); and 728 were suitable to testing both. Because we were interested in  
287 investigating genomic overlap in support for different areas of the species tree, we limited ourselves to  
288 the 728 loci that were potentially informative about both situations. Of these, 418 mapped to one  
289 position on one of the *Quercus robur* pseudochromosomes; and of these, 297 exhibited a log-likelihood  
290 difference of at least 2.0 between the better and more poorly supported topology for the *Dumosae*  
291 hypothesis or the Roburoid hypothesis, or both (Fig. 4). There was no correlation between the Roburoid

292 and Dumosae hypotheses ( $r = -0.0286$ ,  $p = 0.4878$ ), meaning that loci that support or reject either of the  
293 Roburoid hypotheses do not correlate with a particular Dumosae hypothesis. Moreover, whether or not  
294 a locus is located within one of the *Q. robur* gene models has no effect on whether it recovers the  
295 introgression or the divergence history for the Roburoid oaks ( $F_{1,366} = 0.6494$ ,  $p = 0.4209$ ) or the  
296 Dumosae ( $F_{1,415} = 0.0377$ ,  $p = 0.8461$ ).

297 Quartet similarity—the number of taxon quartets with a topology shared between trees over the  
298 total number of quartets that both trees are informative about—between the RAD-seq individual-locus  
299 trees and the singletons tree (Fig. S4) is similarly uninfluenced by presence in one of the gene models  
300 presented in the *Quercus robur* genome (Plomion *et al.*, 2018) ( $F_{1,2542} = 0.0495$ ,  $p = 0.8239$ ) and shows  
301 no evidence of genomic auto-correlation (Fig. S5). Rather, loci that support the tree are distributed  
302 across the genome. The same is true using locus trees to investigate the support for selected nodes of  
303 the phylogeny, all strongly supported (bootstrap support > 95% for all nodes tested; Fig. S1) (Fig. 5).  
304 The 2762 RAD-seq locus trees made 4,745 branch-level support claims and 27,283 conflict claims on  
305 the singletons tree, of which 6,409 total claims pertain to the nodes investigated, ranging from 107 to  
306 1,055 per node ( $427.3 \pm 273.7$ ; Fig. 5). The locus-by-locus incongruence is high at this level: the  
307 proportion of loci concordant with each node averages  $0.2395 \pm 0.2523$ , but the range is high, from  
308 0.6879 for the genus as a whole to as low as 0.0075 for the Mexican red oaks and 0.0088 for the  
309 Mexican white oaks (Table S5). There is no genomic autocorrelation in support vs. rejection of nodes  
310 in the singletons tree by individual locus trees (as inferred using phyparts; Smith *et al.*, 2015) (Fig. S6),  
311 but the correlation between the crown age of clades investigated and the proportion of loci concordant  
312 with the crown age is positive and moderately significant ( $r = 0.4996$ ,  $p = 0.0579$ ; Fig. S7). Three  
313 clades stand out as outliers for high proportion of loci supporting divergence (outside the 95%  
314 regression CI): the genus as a whole, and sections *Cerris* and *Ilex*. This widespread genomic  
315 incongruence is reflected in broad network-like reticulation in the neighbor-net tree at the base of most  
316 clades (Fig. 6).

317

## 318 **Discussion**

319 Our analyses demonstrate that the diversity of oaks we observe today reflects deep geographic  
320 separation of major clades within the first 15 million years after the origin of the genus, and that  
321 standing species diversity arose mostly within the last 10 million years, predominantly in four rapidly  
322 diversifying clades that together account for ca. 60% of the diversity of the genus. Previous work has  
323 demonstrated American oak diversity was shaped in large part by ecological opportunity, first by the  
324 space left by tropical forests as they receded from North America, then by migration into the mountains

325 of Mexico (Hipp *et al.*, 2018; Cavender-Bares *et al.*, 2018). The current study deepens this  
326 understanding by demonstrating two increases in diversification rates in Eurasia: one in the Eurasian  
327 white oaks, which arrived from eastern North America 7.5 to 18 Ma to low continental oak diversity,  
328 and no closely related oaks; and one in the southeast Asian section *Cyclobalanopsis*, driven by  
329 changing climates and the Himalayan orogeny (Deng *et al.*, 2018). At the same time, our work  
330 demonstrates widespread genomic incongruence in phylogenetic history, with alternative phylogenetic  
331 histories interleaved across all linkage groups. Contrary to our hypothesis at the outset of this study,  
332 there appear to be no regions of the genome that on their own define the entire oak phylogeny. Instead,  
333 the primary divergence history of oaks (Crowl *et al.*, In review; McVay *et al.*, 2017b) knits together  
334 and emerges from a patchwork of histories that comprise the oak genome.

335

### 336 *Topology and timing of the global oak phylogeny*

337 Our work indicates that by the mid-Eocene (45 Ma), all *Quercus* sections (*vide* Denk *et al.*, 2017),  
338 representing eight major clades of the genus, had originated with the possible exception of section  
339 *Quercus*, which under the stem calibrations scenario arose at the Eocene-Oligocene boundary (33 Ma).  
340 Following this compressed interval of crown radiation, diversification rates spiked in the late Miocene  
341 to Pliocene, ca. 10 Ma (Fig. 2), primarily in southeast Asia, Mexico, and the white oaks of Eurasia. The  
342 eight fossil calibrations that we utilize here, and the two alternative methods of calibrating the tree (Fig.  
343 S3a-c), bracket what we consider to be a wide range of the plausible diversification times for the genus;  
344 so that while additional calibrations and a wider range of rate models bear investigation, we consider  
345 this overall finding for the shape and timing of oak diversification to be reasonable.

346 While *Quercus* arose at around the early Eocene climatic optimum (the earliest known *Quercus*  
347 fossil is pollen from Sankt Pankratz, Austria, 47°45' N latitude, ca. 56 Ma; Hofmann *et al.*, 2011), early  
348 fossils range as far north as Axel Heiberg Island in far northern Canada, which at 79° (both modern and  
349 paleolatitude in early Eocene; Scotese, 2014) is 20° further north than the northernmost oak populations  
350 today. As it followed the cooling climate southward, the genus remained largely a lineage of the  
351 northern temperate zone with some species of sections *Virentes*, *Lobatae*, and *Quercus* inhabiting  
352 tropical climates; but even these possess physiological adaptations that reflect their temperate ancestry  
353 (Cavender-Bares, 2019). In Eurasia, section *Cyclobalanopsis* dominates in subtropical evergreen  
354 broadleaf forests (Deng *et al.*, 2018), but the sister sections *Cerris* and *Ilex* are temperate to  
355 Mediterranean. This climatic conservatism structures the geographic distribution of oak clades at  
356 several levels. Geographic patterns among and within major clades in the American oaks (subg.  
357 *Quercus*) have already been studied in detail, with geographic differentiation among the western U.S.,

358 the eastern U.S., and the southwestern U.S. and Mexico / Central America in each of two sections  
359 approximately simultaneously (Hipp *et al.*, 2018). The current phylogeny makes clear that in the  
360 Eurasian white oaks of sect. *Quercus*, the Roburoid clade, the morphologically distinctive  
361 Mediterranean, dry-adapted species often treated as subsection *Galliferae* (e.g., Tschan & Denk, 2012)  
362 are distributed among all four subclades, suggesting that adaptations to the Mediterranean climate are  
363 convergent within the Roburoid clade; as discussed below under *Rapid diversification of the Eurasian*  
364 *white oaks*, it is geography rather than ecology or morphology that defines clades: species within clades  
365 are mostly separated by ecology, not geography. Likewise, the western Eurasian members of section  
366 *Ilex* form an inclusive subtree, in which the two widespread Mediterranean species *Q. coccifera* and *Q.*  
367 *ilex* are clearly separated and placed sister to the montane Asian clade. The geographically most distant  
368 species of the section are also genetically most distinct (Fig. 6). Even within clades, geographic  
369 structuring is evident. In section *Cerris*, for example, the east and west Eurasian species group in sister  
370 clades; within these latter, the western Mediterranean *Q. crenata* and *Q. suber* ‘corkish oaks’, the Near  
371 East ‘Aegilops’ oaks (*Q. brantii*, *Q. ithaburensis*, *Q. macrolepis*), and the remaining central-eastern  
372 Mediterranean members of the section are clearly separated. Within sect. *Quercus*, the North American  
373 Prinoids and Albae form a grade, reflecting diversification in North America predating dispersal of the  
374 Roburoid ancestor back to Eurasia. Once established in Eurasia, this lineage then diverged into East  
375 Asian and western Eurasian sister clades, ca. 10 My after isolation from its North American ancestors.  
376 Geography is imprinted in the oak phylogeny across clades, time periods, and continents.

377 Despite the older crown-age inferences in the current study in comparison to the RAD-seq  
378 studies of 2015–2018, relative dates in the present study confirm earlier results that the American oaks  
379 increased in diversification rate as they entered Mexico (in both red oaks and white oaks). It broadens  
380 this perspective with a global sample, providing evidence that the relative diversification rate of the  
381 *Glauca*, *Acuta*, and *Semiserrata* clades of the semitropical southeast Asian section *Cyclobalanopsis* is  
382 comparable to if not higher than the Mexican diversification. To a lesser extent, the Eurasian white  
383 oaks (the Roburoid clade) also show an increased rate of diversification. It is worth noting that the  
384 crown age of the Roburoid clade as a whole may be younger than our inferences, as fossil data raise  
385 some questions as to whether the Old World Roburoids were already isolated by the early Oligocene.  
386 Eocene sect. *Quercus* from Axel Heiberg Island (Canada), for example, appears to be closely allied  
387 with East Asian white oaks, and *Quercus furuhjelmi* from the Paleogene of Alaska and central Asia  
388 might belong to any of the modern New World or Old World white oak lineages, as might the early  
389 Oligocene *Quercus kodairae* and *Q. kobatakei* from Japan (Camus, 1936, 1938; Tanai & Uemura,  
390 1994; Menitsky, 2005; Denk & Grimm, 2010; Tschan & Denk, 2012). Whereas previous analysis of

391 *Fagus* (Fagaceae) found an unambiguous deep split between North American and Eurasian beech  
392 species that was also backed by fossils (Renner *et al.*, 2016), the fossil data we have to date do not  
393 conclusively pin down the divergence between the North American and Eurasian white oaks. By  
394 contrast, the inferred early Miocene split between western Eurasian and East Asian white oaks is  
395 compatible with fossil evidence (Denk & Grimm, 2010), lending support to the observed increase in  
396 diversification rates observed in this study.

397

#### 398 *Taxonomy of the Mexican and Central American oaks*

399 The general high species-coherence we observe in the all-tips tree provides strong evidence that oak  
400 species, in general, are genetically coherent biological entities. The fact that 97 of the 147 species with  
401 more than one sample cohere for all samples provides the broadest test to date of species coherence in  
402 oaks. Among the species that do not exhibit coherence, the majority are from Mexico. Two sets of  
403 examples suggest that the Mexican oaks, while having been the focus of extensive taxonomic study  
404 (e.g., Trelease, 1924; Spellenberg & Bacon, 1996; Spellenberg *et al.*, 1998; González-Villarreal, 2003;  
405 Valencia-A., 2004; de Beaulieu & Lamant, 2010), may harbor even higher species diversity than  
406 current estimates. The examples of *Quercus laeta* (González-Elizondo *et al.*, In prep.) and *Q. konzattii*  
407 (McCauley *et al.*, In revision; McCauley & Oyama, In prep.) exemplify a problem likely to be common  
408 in Mexican oaks. Both species have samples from northern and central to southern Mexico.

409 Researchers working with them have noticed that northern and southern populations differ and may  
410 constitute separate species as our molecular data suggest. These samples are from two centers of  
411 Mexican oak diversity (Torres-Miranda *et al.*, 2011, 2013; Rodríguez-Correa *et al.*, 2015) and may  
412 reflect even higher species diversity in areas already known for high diversity. Interestingly, the  
413 observed divergence between northern Mexico and the Jalisco and Oaxaca samples in these examples  
414 appear to correlate with the formation of the Tepic-Zacoalco rift 5.5 Ma in the Jalisco block (Ferrari &  
415 Rosas-Elguera, 2000) and not with climatic transitions during the Pleistocene, which has been argued  
416 to be more a period of population movement than of speciation in the neotropics (Bennett *et al.*, 2012).  
417 Notably, one of the youngest groups in the white oaks is located in the Sierra Madre Occidental, which  
418 harbors great habitat diversity in relatively small areas (Torres-Morales *et al.*, 2010). The rugged and  
419 relatively young topography, a product of magmatism and subduction processes that lasted up through  
420 12 Ma (Ferrari *et al.*, 2018), and the convergence of temperate and tropical climates shaped the high  
421 diversification rates.

422 Several other cases of confusing taxonomy involving Mexican and Central American species  
423 are less clear. For example, the sect. *Lobatae* complex involving *Q. eugeniifolia*, *Q. benthamii*, *Q.*



424 *cortesii* and *Q. lowilliamsii*, has a history of extensive taxonomic complication (Quezada Aguilar *et al.*,  
425 2016). The current work provides evidence that the species constitute a complex meriting more  
426 attention and draws attention to the possibility that Central American oak diversity and the role of  
427 Central American geology in Neotropical oak diversification has been underestimated (Cárdenes-Sandí  
428 *et al.*, 2019), overshadowed as they have been by interest in the Mexican oak diversification (Quezada  
429 Aguilar *et al.*, 2017). In the white oaks *s.str.* (sect. *Quercus*), cases such as *Q. insignis* and *Q.*  
430 *corrugata* seem even more obscure. Field observations (HG-C) suggest subtle differences between *Q.*  
431 *insignis*, a species of conservation concern from Jalisco, Oaxaca, Chiapas and Veracruz (Jerome,  
432 2018), and *Q. corrugata* (from Chiapas and Oaxaca), but our molecular data are inconclusive. In  
433 general, taxonomy of the recently diverged or still-diverging Mexican species is particularly  
434 complicated because of extensive hybridization and introgression, even among relatively distantly  
435 related species (Spellenberg, 1995; Bacon & Spellenberg, 1996; González-Rodríguez *et al.*, 2004;  
436 Bacon *et al.*, 2011) and the dynamics of recent or ongoing speciation.

437

#### 438 *Rapid diversification of Eurasian white oaks*

439 Among the long-studied oaks of Eurasia (e.g., Camus, 1936, 1938, 1952; Schwarz, 1993; Menitsky,  
440 2005), the data presented here point to the important role of ecological and morphological convergence  
441 among unrelated oaks. Phylogeny of the Eurasian white oaks (the Roburoid clade of section *Quercus*)  
442 has not previously been addressed in detail, despite their importance to our understanding of oak  
443 biodiversity and biology (cf. Kremer *et al.*, 1991; Dumolin-Lapegue *et al.*, 1997; Petit *et al.*, 1997;  
444 Leroy *et al.*, 2017 and references therein). Previous work has sampled a maximum of 14 Roburoid  
445 species (Hubert *et al.*, 2014), but not recovered the monophyly of the clade, much less relationships  
446 among species. Our study includes 23 of the estimated 25 Roburoid white oak species, the strongest  
447 sampling to date. The late Miocene increase in diversification rate inferred in our study at the base of  
448 the western Eurasian white oaks clade is a particularly exciting finding, as it is one of only four major  
449 upticks in diversification inferred in our study. Our sampling of northern temperate white and red oaks  
450 is almost complete, and we have accounted for sampling bias in our diversification analyses, making it  
451 unlikely that the increase in diversification rate detected here is artefactual. The fact that the Roburoids  
452 are a northern temperate clade makes their radiation notable.

453 The unexpected increase in diversification rate in the Roburoids parallels the sympatric  
454 diversification of red and white oaks in North America, with divergence within clades and geographic  
455 regions accompanying convergence between clades (Cavender-Bares *et al.*, 2018). As in the Mexican  
456 oak diversification (Torres-Miranda *et al.*, 2011; Rodríguez-Correa *et al.*, 2015), the western Eurasian



457 white oaks are ecologically diverse, ranging from lowland swamp to Mediterranean scrub, steppe and  
458 from mesic lowland forests to subalpine timberline (de Beaulieu & Lamant, 2010). The European  
459 Roburoid clades are not readily diagnosable morphologically, and the morphological and ecological  
460 convergence among clades has led to taxonomic confusion. The morphologically distinctive  
461 Mediterranean, dry-adapted species (subsection *Galliferae*; cf. Tschan & Denk, 2012), for example, are  
462 distributed among all four subclades. Conversely, Roburoid clades 1 to 4 show geographic sorting  
463 whereas differentiation within clades commonly reflects ecological and climatic niche evolution along  
464 with morphological adaptations (e.g. from deciduous large lobed leaves to small, brevideciduous,  
465 unlobed leaves). Our study thus demonstrates that across the genus, ecological diversification within  
466 clades has shaped diversification.

467

#### 468 *Genomic landscape of the global oak phylogeny*

469 The current study uses mapped phylogenomic markers to demonstrate that the oak tree of life is etched  
470 broadly across the genome. Previous work demonstrated that approximately 19% of RAD-seq loci were  
471 associated with ESTs (Hipp *et al.*, 2014), but that the EST-associated RAD-seq loci analyzed alone did  
472 not yield a topology that was different or differently supported than the RAD-seq loci not associated  
473 with EST markers, and that they were not differently apportioned to the base or the tips of the  
474 phylogeny (which might have suggested that RAD-seq loci associated with coding regions were more  
475 or less conservative or more or less homoplasious than the remainder). In the current study, 6,099  
476 (31.3%) of RAD-seq loci in our dataset that map uniquely to one position in the genome do so in or  
477 overlapping with a predicted gene in the *Quercus robur* genome (as expected from a methylation-  
478 sensitive restriction enzyme; Rabinowicz *et al.*, 2005; Pegadaraju *et al.*, 2013). Our work demonstrates  
479 that gene-based RAD-seq loci do not differ from non-gene-based RAD-seq loci in similarity to the  
480 consensus tree or on introgression rates in the Roburoids and the Dumosae. Gene identity tells us little  
481 or nothing about how reliably a region of the genome records phylogenetic history.

482 At the same time, non-significant correlation between loci that strongly differentiate alternative  
483 topologies in the Dumosae and Roburoids suggests that these stories segregate nearly independently on  
484 the genome. There is also no evidence of genomic autocorrelation of phylogenetic informativeness in  
485 our study, despite the fact that our study has more mapped markers that significantly differentiate  
486 topologies in at least one of these parts of the tree than a previous study investigating genomic  
487 architecture of differentiation at the species level ( $N = 158$  mapped markers with known  $G_{ST}$ ; Scotti-  
488 Saintagne *et al.*, 2004). Our hypothesis that there are particular genes or regions of the genome that  
489 define the oak phylogeny globally appears to be false: rather, the phylogenetic history of oaks is

490 defined by different genes in different lineages, making evolutionary history of oaks a phylogenetic and  
491 genomic mosaic. The effort to find a single best suite of genes for phylogenetic or population genetic  
492 inference across the oak genus is thus unlikely to be successful, though markers can clearly be designed  
493 for individual clades (Guichoux *et al.*, 2011; Fitzek *et al.*, 2018). What is perhaps most remarkable is  
494 that this heterogeneity of histories covarying independently along the oak genome yields, in aggregate,  
495 an evolutionary history of the complex genus that mirrors the morphological and ecological diversity of  
496 living and fossil oak species.

497

## 498 **Conclusion**

499 Questions about the genomic architecture of population differentiation and speciation are generally  
500 asked at fine scales (Leroy *et al.*, 2017, 2018), at the point at which population level processes directly  
501 shape genomic differentiation. But microevolution—comprising processes at the population level—  
502 leaves an imprint in the phylogeny; when such impressions persist, they can often be detected using  
503 topological methods that may be sensitive even to introgression along internal phylogenetic branches  
504 (Eaton *et al.*, 2015; Solís-Lemus & Ané, 2016; McVay *et al.*, 2017b). With multiple Fagaceae genomes  
505 now becoming available (Staton *et al.*, 2015; Plomion *et al.*, 2016, 2018; Sork *et al.*, 2016; Ramos *et*  
506 *al.*, 2018), we may soon be able to detangle the mosaic history of oaks and understand what story each  
507 gene tells. The current study makes clear that the phylogeny we unravel will neither be unitary nor told  
508 by a small subset of the genome, as the regions of the genome capturing the divergence history for one  
509 clade are not the regions capturing the divergence history of another. Understanding phylogenetic  
510 history in the face of this variation is only one problem. It will be followed by a greater one: how do we  
511 interpret the history of oak diversification in space and time if it is really a collection of diverse  
512 histories from different regions of the genome, all reflecting different evolutionary pathways, all  
513 equally real?

514

## 515 **Acknowledgements**

516 Funding for this project was provided by U.S. National Science Foundation Awards 1146488 to ALH,  
517 1146102 to PSM and 1146380 to JCB; Swedish Research Grants 2015-03986 to TD and 2009-00000 to  
518 GWG; support of the German Centre for Integrative Biodiversity Research (iDiv) Halle-Jena-Leipzig  
519 funded by the German Research Foundation (FZT 118) to E-DS and GWG; and The Morton  
520 Arboretum Center for Tree Science. This paper is dedicated to the memory of Michael Avishai (1935-  
521 2018), founder of the Jerusalem Botanical Gardens and cherished colleague.

522

523

524 **Author Contributions**

525 ALH, PSM, JCB, MD, AK, CP, and AG-R conceived and designed the study. ALH, PSM, MH, MA,  
526 JCB, MD, TD, OG, MSG-E, AG-R, GWG, X-LJ, JDM, HR-C, MCS, VLS, and SV-A collected,  
527 identified, and curated samples. ALH, PSM, MH, JCB, AC, MD, TD, AG-R, GWG, X-LJ, JDM, VLS  
528 generated and analyzed phylogenetic data. CB, AK, IL, CP generated and analyzed genomic data.  
529 ALH, PSM, TD and GWG drafted the manuscript. All authors wrote and edited the manuscript.

530

531

532 **References**

533 **Anderson E. 1953.** Introgressive Hybridization. *Biological Reviews* **28**: 280–307.

534 **Bacon JR, Dávila-Aranda PD, Spellenberg R, González-Elizondo MS. 2011.** The taxonomic status  
535 of the Mexican oak *Quercus undata* (Fagaceae, *Quercus*, section *Quercus*). *Revista Mexicana de*  
536 *Biodiversidad* **82**: 1123–1131.

537 **Bacon JR, Spellenberg R. 1996.** Hybridization in two distantly related Mexican black oaks *Quercus*  
538 *conzattii* and *Quercus eduardii* (Fagaceae: *Quercus*: section *Lobatae*). *SIDA, Contributions to Botany*  
539 **17**: 17–41.

540 **Baird NA, Etter PD, Atwood TS, Currey MC, Shiver AL, Lewis ZA, Selker EU, Cresko WA,**  
541 **Johnson EA. 2008.** Rapid SNP Discovery and Genetic Mapping Using Sequenced RAD Markers.  
542 *PLOS ONE* **3**: e3376.

543 **de Beaulieu A le H, Lamant T. 2010.** *Guide Illustré des Chênes*. Geer, Belgium: Edilens.

544 **Bennett K, Bhagwat S, Willis K. 2012.** Neotropical refugia. *The Holocene* **22**: 1207–1214.

545 **Bjørnstad ON. 2008.** *ncf: spatial nonparametric covariance functions*.

546 **Bjørnstad ON, Falck W. 2001.** Nonparametric spatial covariance functions: Estimation and testing.  
547 *Environmental and Ecological Statistics* **8**: 53–70.

548 **Boecklen WJ. 2017.** Topology of syngameons. *Ecology and Evolution* **7**: 10486–10491.

549 **Botsyun S, Sepulchre P, Donnadieu Y, Risi C, Licht A, Rugenstein JKC. 2019.** Revised  
550 paleoaltimetry data show low Tibetan Plateau elevation during the Eocene. *Science* **363**: eaaq1436.

551 **Bryant D, Moulton V. 2004.** Neighbor-Net: An Agglomerative Method for the Construction of  
552 Phylogenetic Networks. *Molecular Biology and Evolution* **21**: 255–265.

553 **Camacho C, Coulouris G, Avagyan V, Ma N, Papadopoulos J, Bealer K, Madden TL. 2009.**  
554 BLAST+: architecture and applications. *BMC Bioinformatics* **10**: 421.

- 555 **Camus AA. 1936.** *Monographie du genre Quercus. Tome I. Genre Quercus. Sous-genre*  
556 *Cyclobalanopsis et sous-genre Euquercus (Section Cerris et Mesobalanu).* Paris: Editions Paul  
557 Lechevalier.
- 558 **Camus AA. 1938.** *Monographie du genre Quercus. Tome II. Genre Quercus. Sous-genre Euquercus*  
559 *(sections Lepidobalanus et Macrobalanus).* Paris: Editions Paul Lechevalier.
- 560 **Camus AA. 1952.** *Monographie du genre Quercus. Tome III. Genre Quercus. Sous-genre Euquercus*  
561 *(sections Protobalanus et Erythrobalanus).* Paris: Editions Paul Lechevalier.
- 562 **Cannon CH, Lerdau M. 2015.** Variable mating behaviors and the maintenance of tropical  
563 biodiversity. *Frontiers in Genetics* **6**.
- 564 **Cannon CH, Scher CL. 2017.** Exploring the potential of gametic reconstruction of parental genotypes  
565 by F1 hybrids as a bridge for rapid introgression. *Genome* **60**: 713–719.
- 566 **Cárdenes-Sandí GM, Shadik CR, Correa-Metrio A, Gosling WD, Cheddadi R, Bush MB. 2019.**  
567 Central American climate and microrefugia: A view from the last interglacial. *Quaternary Science*  
568 *Reviews* **205**: 224–233.
- 569 **Cavender-Bares J. 2019.** Diversification, adaptation, and community assembly of the American oaks  
570 (*Quercus*), a model clade for integrating ecology and evolution. *New Phytologist* **221**: 669–692.
- 571 **Cavender-Bares J, Gonzalez-Rodriguez A, Eaton DAR, Hipp AL, Beulke A, Manos PS. 2015.**  
572 Phylogeny and biogeography of the American live oaks (*Quercus* subsection *Virentes*): A genomic and  
573 population genetics approach. *Molecular Ecology* **24**: 3668–3687.
- 574 **Cavender-Bares J, Kothari S, Meireles JE, Kaproth MA, Manos PS, Hipp AL. 2018.** The role of  
575 diversification in community assembly of the oaks (*Quercus* L.) across the continental U.S. *American*  
576 *Journal of Botany* **105**: 565–586.
- 577 **Crowl AA, McVay JD, Manos PS, Hipp AL, Lemmon A, Lemmon E. In review.** Uncovering the  
578 genomic signature of ancient introgression between white oak lineages (*Quercus*) using anchored  
579 enrichment. *New Phytologist*.
- 580 **Deng M, Jiang X-L, Hipp AL, Manos PS, Hahn M. 2018.** Phylogeny and biogeography of East  
581 Asian evergreen oaks (*Quercus* section *Cyclobalanopsis*; Fagaceae): Insights into the Cenozoic history  
582 of evergreen broad-leaved forests in subtropical Asia. *Molecular Phylogenetics and Evolution* **119**:  
583 170–181.
- 584 **Denk T, Grimm GW. 2009.** Significance of Pollen Characteristics for Infrageneric Classification and  
585 Phylogeny in *Quercus* (Fagaceae). *International Journal of Plant Sciences* **170**: 926–940.
- 586 **Denk T, Grimm GW. 2010.** The oaks of western Eurasia: Traditional classifications and evidence  
587 from two nuclear markers. *Taxon* **59**: 351–366.
- 588 **Denk T, Grimm GW, Grímsson F, Zetter R. 2013.** Evidence from ‘Köppen signatures’ of fossil  
589 plant assemblages for effective heat transport of Gulf Stream to subarctic North Atlantic during  
590 Miocene cooling. *Biogeosciences* **10**: 7927–7942.

- 591 **Denk T, Grimm GW, Manos PS, Deng M, Hipp AL. 2017.** An Updated Infrageneric Classification  
592 of the Oaks: Review of Previous Taxonomic Schemes and Synthesis of Evolutionary Patterns. In: Tree  
593 Physiology. Oaks Physiological Ecology. Exploring the Functional Diversity of Genus *Quercus* L.  
594 Springer, Cham, 13–38.
- 595 **Denk T, Grimsson F, Zetter R. 2010.** Episodic migration of oaks to Iceland: Evidence for a North  
596 Atlantic ‘land bridge’ in the latest Miocene. *American Journal of Botany* **97**: 276–287.
- 597 **Dodd RS, Afzal-Rafii Z. 2004.** Selection and dispersal in a multispecies oak hybrid zone. *Evolution*  
598 **58**: 261–269.
- 599 **Donoghue Philip C. J., Yang Ziheng. 2016.** The evolution of methods for establishing evolutionary  
600 timescales. *Philosophical Transactions of the Royal Society B: Biological Sciences* **371**: 20160020.
- 601 **Dumolin-Lapegue S, Demesure B., Fineschi S, Come V. L, Petit RJ. 1997.** Phylogeographic  
602 structure of white oaks throughout the European continent. *Genetics* **146**: 1475–1487.
- 603 **Eaton DAR. 2014.** PyRAD: assembly of de novo RADseq loci for phylogenetic analyses.  
604 *Bioinformatics (Oxford, England)* **30**: 1844–1849.
- 605 **Eaton DAR, Hipp AL, González-Rodríguez A, Cavender-Bares J. 2015.** Historical introgression  
606 among the American live oaks and the comparative nature of tests for introgression. *Evolution* **69**:  
607 2587–2601.
- 608 **Edelman NB, Frandsen P, Miyagi M, Clavijo BJ, Davey J, Dikow R, Accinelli GG, Belleghem SV,  
609 Patterson NJ, Neafsey DE, et al. 2018.** Genomic architecture and introgression shape a butterfly  
610 radiation. *bioRxiv*: 466292.
- 611 **Ferrari L, Orozco-Esquivel T, Bryan SE, López-Martínez M, Silva-Fragoso A. 2018.** Cenozoic  
612 magmatism and extension in western Mexico: Linking the Sierra Madre Occidental silicic large  
613 igneous province and the Comondú Group with the Gulf of California rift. *Earth-Science Reviews* **183**:  
614 115–152.
- 615 **Ferrari L, Rosas-Elguera J. 2000.** Late Miocene to Quaternary extension at the northern boundary of  
616 the Jalisco Block, western Mexico: The Tepic-Zacoalco Rift revised. In: Special Paper 334: Cenozoic  
617 tectonics and volcanism of Mexico. Geological Society of America, 41–63.
- 618 **Fitzek E, Delcamp A, Guichoux E, Hahn M, Lobdell M, Hipp AL. 2018.** A nuclear DNA barcode  
619 for eastern North American oaks and application to a study of hybridization in an Arboretum setting.  
620 *Ecology and Evolution* **8**: 5837–5851.
- 621 **Fitz-Gibbon S, Hipp AL, Pham KK, Manos PS, Sork V. 2017.** Phylogenomic inferences from  
622 reference-mapped and de novo assembled short-read sequence data using RADseq sequencing of  
623 California white oaks (*Quercus* subgenus *Quercus*). *Genome* **60**: 743–755.
- 624 **Folk RA, Soltis PS, Soltis DE, Guralnick R. 2018.** New prospects in the detection and comparative  
625 analysis of hybridization in the tree of life. *American Journal of Botany* **105**: 364–375.



- 626 **González-Rodríguez A, Arias DM, Valencia-A. S, Oyama K. 2004.** Morphological and RAPD  
627 analysis of hybridization between *Quercus affinis* and *Q. laurina* (Fagaceae), two Mexican red oaks.  
628 *American Journal of Botany* **91**: 401–409.
- 629 **González-Villarreal LM. 2003.** Two new species of oak (Fagaceae, *Quercus* sect. *Lobatae*) from the  
630 Sierra Madre del Sur, Mexico. *Brittonia* **55**: 49–60.
- 631 **Grímsson F, Zetter R, Grimm GW, Pedersen GK, Pedersen AK, Denk T. 2015.** Fagaceae pollen  
632 from the early Cenozoic of West Greenland: revisiting Engler’s and Chaney’s Arcto-Tertiary  
633 hypotheses. *Plant Systematics and Evolution* **301**: 809–832.
- 634 **Guichoux E, Lagache L, Wagner S, Léger P, Petit RJ. 2011.** Two highly validated multiplexes (12-  
635 plex and 8-plex) for species delimitation and parentage analysis in oaks (*Quercus* spp.). *Molecular*  
636 *Ecology Resources* **11**: 578–585.
- 637 **Hardin JW. 1975.** Hybridization and introgression in *Quercus alba*. *Journal of the Arnold Arboretum*  
638 **56**: 336–363.
- 639 **Hauser DA, Keuter A, McVay JD, Hipp AL, Manos PS. 2017.** The evolution and diversification of  
640 the red oaks of the California Floristic Province (*Quercus* section *Lobatae*, series *Agrifoliae*). *American*  
641 *Journal of Botany* **104**: 1581–1595.
- 642 **Hipp AL. 2017.** American oaks in an evolutionary context. In: Jerome D, Beckman E, Kenny L,  
643 Wenzell K, Kua C-S, Westwood M, eds. *The Red List of US Oaks*. Lisle: USDA Forest Service and  
644 The Morton Arboretum, 10–11.
- 645 **Hipp AL. 2018.** Pharaoh’s Dance: the oak genomic mosaic. *PeerJ Preprints* **6**: e27405v1.
- 646 **Hipp AL, Eaton DAR, Cavender-Bares J, Fitzek E, Nipper R, Manos PS. 2014.** A framework  
647 phylogeny of the American oak clade based on sequenced RAD data. *PLoS ONE* **9**: e93975.
- 648 **Hipp AL, Manos PS, González-Rodríguez A, Hahn M, Kaproth M, McVay JD, Avalos SV,**  
649 **Cavender-Bares J. 2018.** Sympatric parallel diversification of major oak clades in the Americas and  
650 the origins of Mexican species diversity. *New Phytologist* **217**: 439–452.
- 651 **Hofmann C-C, Mohamed O, Egger H. 2011.** A new terrestrial palynoflora from the  
652 Palaeocene/Eocene boundary in the northwestern Tethyan realm (St. Pankraz, Austria). *Review of*  
653 *Palaeobotany and Palynology* **166**: 295–310.
- 654 **Hubert F, Grimm GW, Jouselin E, Berry V, Franc A, Kremer A. 2014.** Multiple nuclear genes  
655 stabilize the phylogenetic backbone of the genus *Quercus*. *Systematics and Biodiversity* **12**: 405–423.
- 656 **Huson DH, Bryant D. 2006.** Application of Phylogenetic Networks in Evolutionary Studies.  
657 *Molecular Biology and Evolution* **23**: 254–267.
- 658 **Jerome D. 2018.** *Quercus insignis*. *IUCN Red List of Threatened Species* **2018**: e.T194177A2302931.
- 659 **Jiang X-L, Deng M, Hipp AL, Su T, Yan M-X, Zho Z-K. In review.** East Asian origins of European  
660 holly oaks via the Tibet-Himalayas. *Journal of Biogeography*.



- 661 **Kim BY, Wei X, Fitz-Gibbon S, Lohmueller KE, Ortego J, Gugger PF, Sork VL. 2018.** RADseq  
662 data reveal ancient, but not pervasive, introgression between Californian tree and scrub oak species  
663 (*Quercus* sect. *Quercus*: Fagaceae). *Molecular Ecology* **27**: 4556–4571.
- 664 **Kremer A, Petit R, Zanetto A, Fougère V, Ducouso A, Wagner D, Chauvin C. 1991.** Nuclear and  
665 organelle gene diversity in *Quercus robur* and *Q. petraea*. In: Müller-Starck G, Ziehe M, eds. Genetic  
666 Variation in European Forest Trees. Frankfurt-am-Main: Sauerländer's Verlag, 141–166.
- 667 **Leroy T, Rougemont Q, Dupouey J-L, Bodenes C, Lalanne C, Belser C, Labadie K, Provost GL,  
668 Aury J-M, Kremer A, et al. 2018.** Massive postglacial gene flow between European white oaks  
669 uncovered genes underlying species barriers. *bioRxiv*: 246637.
- 670 **Leroy T, Roux C, Villate L, Bodénès C, Romiguier J, Paiva JAP, Dossat C, Aury J-M, Plomion  
671 C, Kremer A. 2017.** Extensive recent secondary contacts between four European white oak species.  
672 *New Phytologist* **214**: 865–878.
- 673 **Lewis ZA, Shiver AL, Stiffler N, Miller MR, Johnson EA, Selker EU. 2007.** High-Density  
674 Detection of Restriction-Site-Associated DNA Markers for Rapid Mapping of Mutated Loci in  
675 *Neurospora*. *Genetics* **177**: 1163–1171.
- 676 **Manos PS. 2016.** Systematics and biogeography of the American oaks. *International Oaks* **27**: 23–36.
- 677 **McCauley RA, Cortés-Palomec AC, Oyama K. In revision.** Species diversification in a lineage of  
678 Mexican red oak (*Quercus* section *Lobatae* subsection *Racemiflorae*) – the interplay between distance,  
679 habitat, and hybridization. *Tree Genetics & Genomes*.
- 680 **McCauley RA, Oyama K. In prep.** A re-evaluation of taxonomy in *Quercus* section *Lobatae*  
681 subsection *Racemiflorae*, resurrection of the name *Q. pennivenia* and description of a new taxon *Q.*  
682 *huicholensis*.
- 683 **McVay JD, Hauser D, Hipp AL, Manos PS. 2017a.** Phylogenomics reveals a complex evolutionary  
684 history of lobed-leaf white oaks in western North America. *Genome* **60**: 733–742.
- 685 **McVay JD, Hipp AL, Manos PS. 2017b.** A genetic legacy of introgression confounds phylogeny and  
686 biogeography in oaks. *Proc. R. Soc. B* **284**: 20170300.
- 687 **Menitsky YL. 2005.** *Oaks of Asia*. □: Science Publishers. Boca Raton: CRC Press.
- 688 **Miller M, Atwood T, Eames BF, Eberhart J, Yan Y-L, Postlethwait J, Johnson E. 2007a.** RAD  
689 marker microarrays enable rapid mapping of zebrafish mutations. *Genome Biology* **8**: R105.
- 690 **Miller MR, Dunham JP, Amores A, Cresko WA, Johnson EA. 2007b.** Rapid and cost-effective  
691 polymorphism identification and genotyping using restriction site associated DNA (RAD) markers.  
692 *Genome Research* **17**: 240–248.
- 693 **Minh BQ, Nguyen MAT, von Haeseler A. 2013.** Ultrafast Approximation for Phylogenetic Bootstrap.  
694 *Molecular Biology and Evolution* **30**: 1188–1195.
- 695 **Ortego J, Gugger PF, Sork VL. 2018.** Genomic data reveal cryptic lineage diversification and  
696 introgression in Californian golden cup oaks (section *Protobalanus*). *New Phytologist* **218**: 804–818.

- 697 **Pääbo S. 2003.** The mosaic that is our genome. *Nature* **421**: 409–412.
- 698 **Paradis E. 2013.** Molecular dating of phylogenies by likelihood methods: A comparison of models and  
699 a new information criterion. *Molecular Phylogenetics and Evolution* **67**: 436–444.
- 700 **Paradis E, Claude J, Strimmer K. 2004.** APE: Analyses of Phylogenetics and Evolution in R  
701 language. *Bioinformatics* **20**: 289–290.
- 702 **Pegadaraju V, Nipper R, Hulke B, Qi L, Schultz Q. 2013.** De novo sequencing of sunflower genome  
703 for SNP discovery using RAD (Restriction site Associated DNA) approach. *BMC Genomics* **14**: 556.
- 704 **Petit R, Bodenes C, Ducouso A, Roussel G, Kremer A. 2003.** Hybridization as a mechanism of  
705 invasion in oaks. *New Phytologist* **161**: 151–164.
- 706 **Petit RJ, Hampe A. 2006.** Some Evolutionary Consequences of Being a Tree. *Annual Review of*  
707 *Ecology, Evolution, and Systematics* **37**: 187–214.
- 708 **Petit R, Pineau E, Demesure B, Bacilieri R, Ducouso A, Kremer A. 1997.** Chloroplast DNA  
709 footprints of postglacial recolonization by oaks. *Proceedings of the National Academy of Sciences USA*  
710 **94**: 9996–10001.
- 711 **Pham KK, Hahn M, Lueders K, Brown BH, Bruederle LP, Bruhl JJ, Chung K-S, Derieg NJ,**  
712 **Escudero M, Ford BA, et al. 2016.** Specimens at the Center: An Informatics Workflow and Toolkit  
713 for Specimen-Level Analysis of Public DNA Database Data. *Systematic Botany* **41**: 529–539.
- 714 **Pham KK, Hipp AL, Manos PS, Cronn RC. 2017.** A Time and a Place for Everything: Phylogenetic  
715 history and geography as joint predictors of oak plastome phylogeny. *Genome* **60**: 720–732.
- 716 **Plomion C, Aury J-M, Amselem J, Alaeitabar T, Barbe V, Belser C, Bergès H, Bodénès C,**  
717 **Boudet N, Boury C, et al. 2016.** Decoding the oak genome: public release of sequence data, assembly,  
718 annotation and publication strategies. *Molecular Ecology Resources* **16**: 254–265.
- 719 **Plomion C, Aury J-M, Amselem J, Leroy T, Murat F, Duplessis S, Faye S, Francillonne N,**  
720 **Labadie K, Provost GL, et al. 2018.** Oak genome reveals facets of long lifespan. *Nature Plants* **4**:  
721 440–452.
- 722 **Quammen D. 2018.** *The Tangled Tree: A Radical New History of Life*. New York: Simon and  
723 Schuster.
- 724 **Quezada Aguilar ML, Rodas-Duarte L, Marroquín-Tintí AA. 2016.** *Diversidad de encinos en*  
725 *Guatemala; una alternativa para bosques enérgicos, seguridad alimentaria y mitigación al cambio*  
726 *climático. Fase II. Jutiapa, Jalapa y Santa Rosa*. Instituto de Investigaciones Químicas y Biológicas  
727 (IIQB). Centro de Estudios Conservacionistas (CECON), Facultad de Ciencias Químicas y Farmacia.  
728 Universidad de San Carlos de Guatemala.
- 729 **Quezada Aguilar ML, Rodas-Duarte R, Marroquín-n-Tintí- AA. 2017.** Contribución al  
730 conocimiento de los encinos (*Quercus*: Fagaceae) en los departamentos de Alta Verapaz, Baja Verapaz  
731 y Petén, Guatemala. *Ciencia, Tecnología y Salud* **3**: 115–126.

- 732 **Rabinowicz PD, Citek R, Budiman MA, Nunberg A, Bedell JA, Lakey N, O’Shaughnessy AL,**  
733 **Nascimento LU, McCombie WR, Martienssen RA. 2005.** Differential methylation of genes and  
734 repeats in land plants. *Genome Research* **15**: 1431–1440.
- 735 **Rabosky DL. 2014.** Automatic Detection of Key Innovations, Rate Shifts, and Diversity-Dependence  
736 on Phylogenetic Trees. *PLoS ONE* **9**: e89543.
- 737 **Ramos AM, Usié A, Barbosa P, Barros PM, Capote T, Chaves I, Simões F, Abreu I,**  
738 **Carrasquinho I, Faro C, et al. 2018.** The draft genome sequence of cork oak. *Scientific Data* **5**:  
739 180069.
- 740 **R-Development-Core-Team. 2004.** *R: A language and environment for statistical computing*. Vienna.
- 741 **Ree RH, Hipp AL. 2015.** Inferring phylogenetic history from restriction site associated DNA  
742 (RADseq). In: Hoerandl E, Appelhaus M, eds. *Next Generation Sequencing in Plant Systematics*.  
743 Koenigstein: Koeltz Scientific Books, 181–204.
- 744 **Renner SS, Grimm GW, Kapli P, Denk T. 2016.** Species relationships and divergence times in  
745 beeches: new insights from the inclusion of 53 young and old fossils in a birth–death clock model.  
746 *Philosophical Transactions of the Royal Society B: Biological Sciences* **371**: 20150135.
- 747 **Rodríguez-Correa H, Oyama K, MacGregor-Fors I, González-Rodríguez A. 2015.** How Are Oaks  
748 Distributed in the Neotropics? A Perspective from Species Turnover, Areas of Endemism, and Climatic  
749 Niches. *International Journal of Plant Sciences* **176**: 222–231.
- 750 **Sand A, Holt MK, Johansen J, Brodal GS, Mailund T, Pedersen CNS. 2014.** tqDist: a library for  
751 computing the quartet and triplet distances between binary or general trees. *Bioinformatics* **30**: 2079–  
752 2080.
- 753 **Sanderson MJ. 2002.** Estimating absolute rates of molecular evolution and divergence times: a  
754 penalized likelihood approach. *Molecular Biology and Evolution* **19**: 101–109.
- 755 **Schwarz O. 1993.** *Quercus L. Flora Europaea* **I**: 72–76.
- 756 **Scotese CR. 2014.** *Atlas of Paleogene Paleogeographic Maps (Mollweide Projection), Maps 8-15,*  
757 *Volume 1, The Cenozoic, PALEOMAP Atlas for ArcGIS*. Evanston, IL: PALEOMAP Project.
- 758 **Scotti-Saintagne C, Mariette S, Porth I, Goicoechea PG, Barreneche T, Bodenes C, Burg K,**  
759 **Kremer A. 2004.** Genome Scanning for Interspecific Differentiation Between Two Closely Related  
760 Oak Species [*Quercus robur* L. and *Q. petraea* (Matt.) Liebl.]. *Genetics* **168**: 1615–1626.
- 761 **Smith MR. 2019.** Quartet: comparison of phylogenetic trees using quartet and bipartition measures.  
762 doi: 10.5281/zenodo.2536318.
- 763 **Smith SA, Moore MJ, Brown JW, Yang Y. 2015.** Analysis of phylogenomic datasets reveals  
764 conflict, concordance, and gene duplications with examples from animals and plants. *BMC*  
765 *Evolutionary Biology* **15**: 150.
- 766 **Solís-Lemus C, Ané C. 2016.** Inferring Phylogenetic Networks with Maximum Pseudolikelihood  
767 under Incomplete Lineage Sorting. *PLOS Genetics* **12**: e1005896.

- 768 **Solís-Lemus C, Bastide P, Ané C. 2017.** PhyloNetworks: A Package for Phylogenetic Networks.  
769 *Molecular Biology and Evolution* **34**: 3292–3298.
- 770 **Sork VL, Fitz-Gibbon ST, Puiu D, Crepeau M, Gugger PF, Sherman R, Stevens K, Langley CH,**  
771 **Pellegrini M, Salzberg SL. 2016.** First Draft Assembly and Annotation of the Genome of a California  
772 Endemic Oak *Quercus lobata* Née (Fagaceae). *G3: Genes, Genomes, Genetics* **6**: 3485–3495.
- 773 **Spellenberg R. 1995.** On the hybrid nature of *Quercus basaseachicensis* (Fagaceae, sect. *Quercus*).  
774 *Sida, Contributions To Botany* **16**: 427–437.
- 775 **Spellenberg R, Bacon JR. 1996.** Taxonomy and Distribution of a Natural Group of Black Oaks of  
776 Mexico (*Quercus*, Section *Lobatae*, Subsection *Racemiflorae*). *Systematic Botany* **21**: 85–99.
- 777 **Spellenberg R, Bacon JR, González Elizondo MS. 1998.** Los encinos (*Quercus*, Fagaceae) en un  
778 transecto sobre la Sierra Madre Occidental. *Boletín del Instituto de Botánica de la Universidad de*  
779 *Guadalajara* **5**: 357–387.
- 780 **Stamatakis A. 2006.** Phylogenetic models of rate heterogeneity: a high performance computing  
781 perspective. In: Proceedings 20th IEEE International Parallel Distributed Processing Symposium. 8 pp.
- 782 **Stamatakis A. 2014.** RAxML Version 8: A tool for Phylogenetic Analysis and Post-Analysis of Large  
783 Phylogenies. *Bioinformatics* **30**: 1312–1313.
- 784 **Staton M, Zhebentyayeva T, Olukolu B, Fang GC, Nelson D, Carlson JE, Abbott AG. 2015.**  
785 Substantial genome synteny preservation among woody angiosperm species: comparative genomics of  
786 Chinese chestnut (*Castanea mollissima*) and plant reference genomes. *BMC Genomics* **16**: 744.
- 787 **Tanai T, Uemura K. 1994.** Lobed oak leaves from the Tertiary of East Asia with reference to the oak  
788 phytogeography of the northern hemisphere. *Transactions and proceedings of the Paleontological*  
789 *Society of Japan. New series* **1994**: 343–365.
- 790 **Torres-Miranda A, Luna-Vega I, Oyama K. 2011.** Conservation biogeography of red oaks (*Quercus*,  
791 section *Lobatae*) in Mexico and Central America. *American Journal of Botany* **98**: 290–305.
- 792 **Torres-Miranda A, Luna-Vega I, Oyama K. 2013.** New Approaches to the Biogeography and Areas  
793 of Endemism of Red Oaks (*Quercus* L., Section *Lobatae*). *Systematic Biology* **62**: 555–573.
- 794 **Torres-Morales L, García-Mendoza DF, López-González C, Muñoz-Martínez R. 2010.** Bats of  
795 Northwestern Durango, Mexico: Species Richness at the Interface of Two Biogeographic Regions. *The*  
796 *Southwestern Naturalist* **55**: 347–362.
- 797 **Trelease W. 1924.** The American Oaks. *Memoirs of the National Academy of Sciences* **20**: 1–255.
- 798 **Tschan GF, Denk T. 2012.** Trichome types, foliar indumentum and epicuticular wax in the  
799 Mediterranean gall oaks, *Quercus* subsection *Galliferae* (Fagaceae): implications for taxonomy,  
800 ecology and evolution. *Botanical Journal of the Linnean Society* **169**: 611–644.
- 801 **Valencia-A. S. 2004.** Diversidad del género *Quercus* (Fagaceae) en México. *Boletín de la Sociedad*  
802 *Botánica de México* **75**: 33–53.
- 803 **Van Valen L. 1976.** Ecological species, multispecies, and oaks. *Taxon* **25**: 233–239.

804 **Walker JD, Geissman JW, Bowring SA, Babcock LE. 2018.** *Geologic Time Scale v. 5.0: Geological*  
805 *Society of America,*  
806 [https://www.geosociety.org/GSA/Education\\_Careers/Geologic\\_Time\\_Scale/GSA/timescale/home.aspx](https://www.geosociety.org/GSA/Education_Careers/Geologic_Time_Scale/GSA/timescale/home.aspx).

807 **Wen D, Yu Y, Zhu J, Nakhleh L. 2018.** Inferring Phylogenetic Networks Using PhyloNet. *Systematic*  
808 *Biology* **67**: 735–740.

809 **Whittemore AT, Schaal BA. 1991.** Interspecific gene flow in sympatric oaks. *Proceedings of the*  
810 *National Academy of Sciences USA* **88**: 2540–2544.

811 **Zachos J, Pagani M, Sloan L, Thomas E, Billups K. 2001.** Trends, Rhythms, and Aberrations in  
812 Global Climate 65 Ma to Present. *Science* **292**: 686–693.

813 **Zhang C, Ogilvie HA, Drummond AJ, Stadler T. 2018.** Bayesian Inference of Species Networks  
814 from Multilocus Sequence Data. *Molecular Biology and Evolution* **35**: 504–517.

815

816



## 817 **Figure Captions**

818 **Fig. 1.** Singletons tree, calibrated using eight crown calibration fossils (solid lines) or 5 stem-  
819 calibration fossils (dotted lines). Single exemplars per species were analyzed using maximum  
820 likelihood; multiple samples are included for some species to represent cryptic or undescribed diversity  
821 (e.g., in *Quercus arizonica*, *Q. laeta*, *Q. conzattii*) or named infraspecies (e.g., varieties of *Quercus*  
822 *agrifolia* and *Q. parvula*). Labels to the right of the tree indicate subgenera (black) and sections  
823 (medium gray) following the latest taxonomy for the genus (Denk *et al.*, 2017). Branch colors represent  
824 net diversification rates estimated using reversible-jump MCMC in BAMM (Rabosky, 2014),  
825 integrating over uncertainty in the timing and location of shifts in lineage diversification rates.  
826 rjMCMC was conducted with explicit lineage-specific sampling proportions specified, and thus  
827 accounts for the relatively low species sampling in the Mexican / Central American oaks and the  
828 southeast Asian section *Cyclobalanopsis*. All bootstrap values > 100 except for nodes marked with \*,  
829 which are all 80-99 except for two: the common ancestor of *Q. costaricensis* and *Q. humboldtii* and the  
830 MRCA of *Q. myrsinifolia* and *Q. salicina* both have bootstrap values < 5.

831  
832 **Fig. 2.** Lineages-through-time (LTT) plot showing the diversification of five species-rich lineages  
833 (sections *Cerris*, *Cyclobalanopsis*, *Ilex*, *Lobatae*, *Quercus*) within genus *Quercus* for the preferred  
834 (early fossils treated as crown group representatives) and conservative dating (dimmed lines, fossils  
835 treated as stem group taxa). Major tectonic events on the Northern Hemisphere (formation of the  
836 Qinghai-Tibetan Plateau, QTP (Scotese, 2014; Botsyun *et al.*, 2019); closure of the Turgai Sea) and  
837 global climate context (based on marine stable isotope data; Zachos *et al.*, 2001) shown for  
838 comparison. Timing of onset of Arctic glaciation and viability of the North Atlantic Land Bridge for  
839 oak migration are reviewed in Denk *et al.* (2010, 2013) and literature therein. Background colors  
840 indicate Cenozoic epochs/periods (following Walker *et al.* (2018); from left to right: Paleocene,  
841 Eocene, Oligocene, Miocene, Quaternary).

842  
843 **Fig. 3.** RAD-seq loci by chromosome. RAD-seq loci mapping to a unique position on one of the twelve  
844 *Quercus robur* genome pseudochromosomes are included in this figure and analyses reported in the  
845 paper. Chromosome length is based on total sequence length of scaffolds assigned to the *Q. robur*  
846 pseudochromosomes. Genomic position of loci overlapping vs not overlapping a gene was determined  
847 by detecting overlap of the RAD-seq locus start and end points with start and end points of the 25,808  
848 gene models reported for the *Q. robur* genome (Plomion *et al.*, 2018).

849



850 **Fig. 4.** Genomic distribution of loci favoring alternative placements of the Roburoid white oaks and of  
851 *Quercus lobata* / *Quercus macrocarpa*. The 19,468 RAD-seq loci that map to a single position on one  
852 of the *Quercus robur* pseudochromosomes are represented by gray bands; chromosomal areas of darker  
853 gray have a denser mapping of RAD-seq loci. Mapped beside the chromosomes are the positions of  
854 325 RAD-seq loci with a log-likelihood difference of at least 2 between trees constrained to be  
855 monophyletic for the Roburoids vs those placing the Roburoids with *Q. pontica* (194 loci); those  
856 differing by at least 2 between trees constrained to be monophyletic for both the Dumosae and the  
857 Prinoids vs those placing *Q. lobata* or *Q. macrocarpa* in the opposing clade (290 loci); or both (159  
858 loci). These two hypotheses were selected because the topological differences have been demonstrated  
859 in prior studies (Crowl *et al.*, In review; McVay *et al.*, 2017b,a) to be a consequence of introgression,  
860 not lineage sorting alone. The relative mapping of these loci thus provides a study in the distribution of  
861 loci that are informative about population divergence history vs. ancient introgression in two closely  
862 related clades. The mismatch between loci ( $r = -0.0286$ ,  $p = 0.4878$ ) suggests that introgression is not  
863 genomically conserved.

864

865 **Fig. 5.** Loci congruent vs. discordant with key nodes of phylogeny. An average of 123.9 ( $\pm 178.9$ )  
866 RAD-seq locus trees are informative about each of the 15 named clades represented in this figure. Dark  
867 bands indicate RAD-seq loci that support a node; light bands indicate loci that conflict with it.

868

869 **Fig. 6.** Neighbor-net, planar (meta-)phylogenetic network based on pairwise ML distances. Members of  
870 the major clades with unambiguous (tree) support (cf. Fig. 1) are clustered. All currently accepted  
871 sections are color-coded; edge bundles defining neighborhoods corresponding to sections and infra-  
872 sectional clades are colored accordingly. Main biogeographic splits within each section are indicated by  
873 dotted gray lines. The graph depicts the variance in inter- and intra-sectional genetic diversity patterns.  
874 The most genetically unique clades within each subgenus (sect. *Lobatae* for subgenus *Quercus*; sect.  
875 *Cerris* for subgenus *Cerris*) are placed on the right side of the graph; the distance to the spider-web-like  
876 center of the graph, which in this case may represent the point-of-origin (being also the mid-point  
877 between all tips and the connection of both subgenera) reflects the corresponding phylogenetic root-tip  
878 distances observed in the ML tree. Tree-like portions may be indicative of bottleneck situations in the  
879 formation of a clade; fan-like portions reflect potential genetic gradients developed during unhindered  
880 radiation (geographic expansion; note e.g. the position of Texan white and red oaks; strict West-East  
881 ordering within sect. *Ilex*), i.e. absence of major evolutionary bottlenecks.

882

883 **Table 1.** Fossil calibrations used in this study, with nodes indicated as most recent common ancestor of  
884 selected taxa. Max and min indicate maximum and minimum ages for calibrations in Ma. Crown  
885 calibration node and stem calibration node indicate the taxa whose MRCA are the calibration points for  
886 the crown and stem calibration analyses respectively. References cited in Table S2.

| Node                            | Max   | Min   | Crown calibration node                    | Stem calibration node               |
|---------------------------------|-------|-------|-------------------------------------------|-------------------------------------|
| Quercus – genus                 | 56    | 56    | Quercus                                   | Quercus Notholithocarpus            |
| section Lobatae                 | 47.87 | 47.87 | Quercus_agrifolia Quercus_emoryi          | Quercus_agrifolia Quercus_arizonica |
| section Cyclobalanopsis         | 48.32 | 48.32 | Quercus_gilva Quercus_acuta               | Quercus_gilva Quercus_rehderiana    |
| section Quercus                 | 45    | 45    | Quercus_lobata Quercus_arizonica          | Quercus_pontica Quercus_arizonica   |
| section Ilex                    | 47.8  | 37.8  | Quercus_franchetii Quercus_rehderiana     |                                     |
| section Ilex – in part          | 35.5  | 33.4  | Quercus_rehderiana Quercus_semecarpifolia |                                     |
| section Cerris – in part        | 34    | 30    | Quercus_chenii Quercus_acutissima         | Quercus_franchetii Quercus_cerris   |
| section Cerris – European clade | 23    | 20.5  | Quercus_crenata Quercus_cerris            |                                     |

887

## 888 Supplement

889 **Fig. S1.** All-tips tree split by page (separate PDF)

890 **Fig. S2a.** Fossil calibration points: crown calibrations

891 **Fig. S2b.** Fossil calibration points: stem calibrations

892 **Fig. S3a.** Crown calibrations, global sampling estimate (60%)

893 **Fig. S3b.** Stem calibrations with rates, assuming clade-specific sampling proportions.

894 **Fig. S3c.** Stem calibrations, global sampling estimate (60%)

895 **Fig. S4.** Quartet similarity between individual loci and the full, all-tips tree, mapped to chromosomes

896 **Fig. S5.** Splines by chromosomes - quartets

897 **Fig. S6.** Splines by chromosomes - phyparts

898 **Fig. S7.** Phypart components

899

900 **Table S1.** Sampling table (separate XLSX)

901 **Table S2.** Citations for fossil calibrations.

902 **Table S3.** Taxonomic disparity index (TDI) for all unique species

903 **Table S4.**  $\square$ IC values for alternative calibrations

904 **Table S5.** Phypart components and clade ages

905

906 **Methods S1.** Analysis details.

907

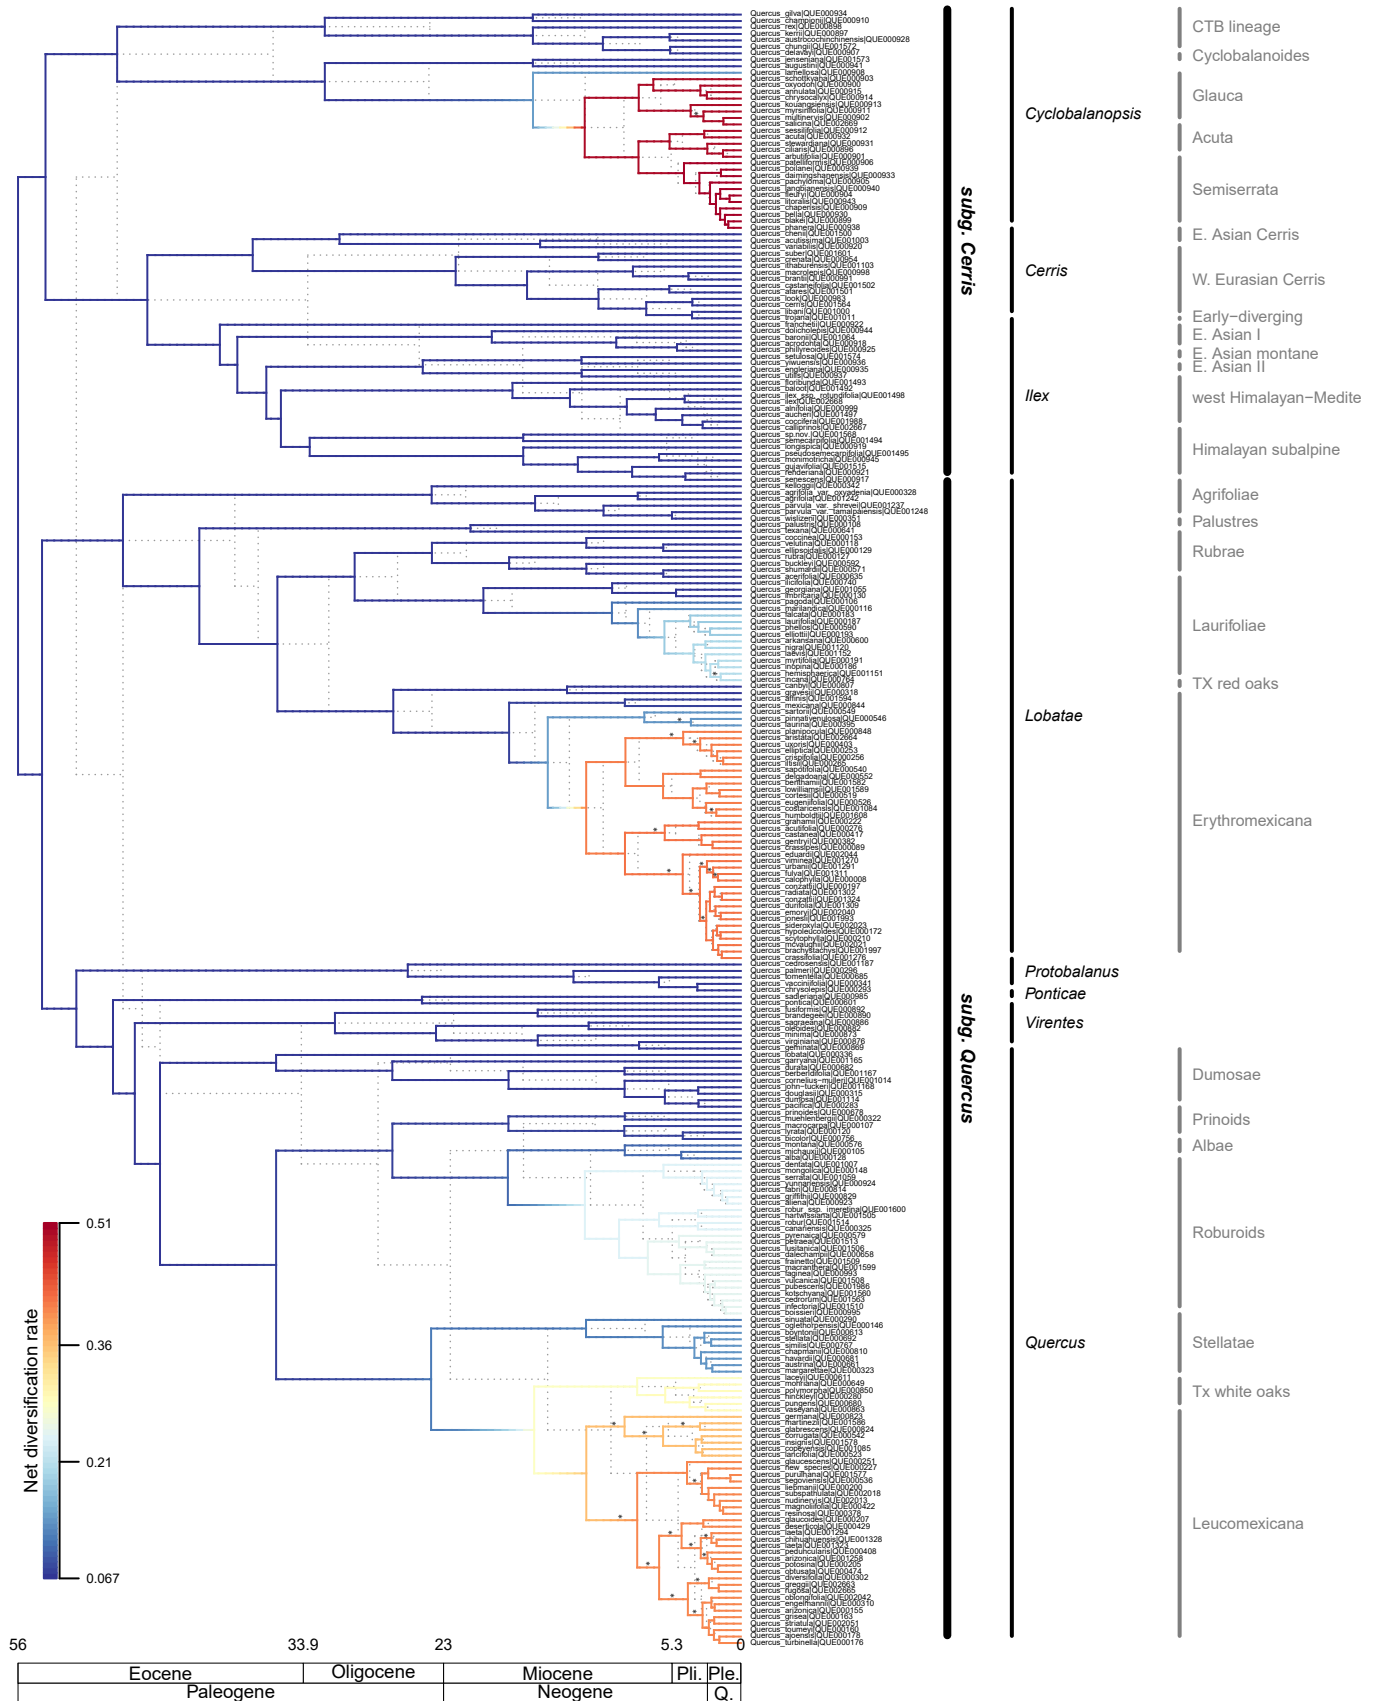

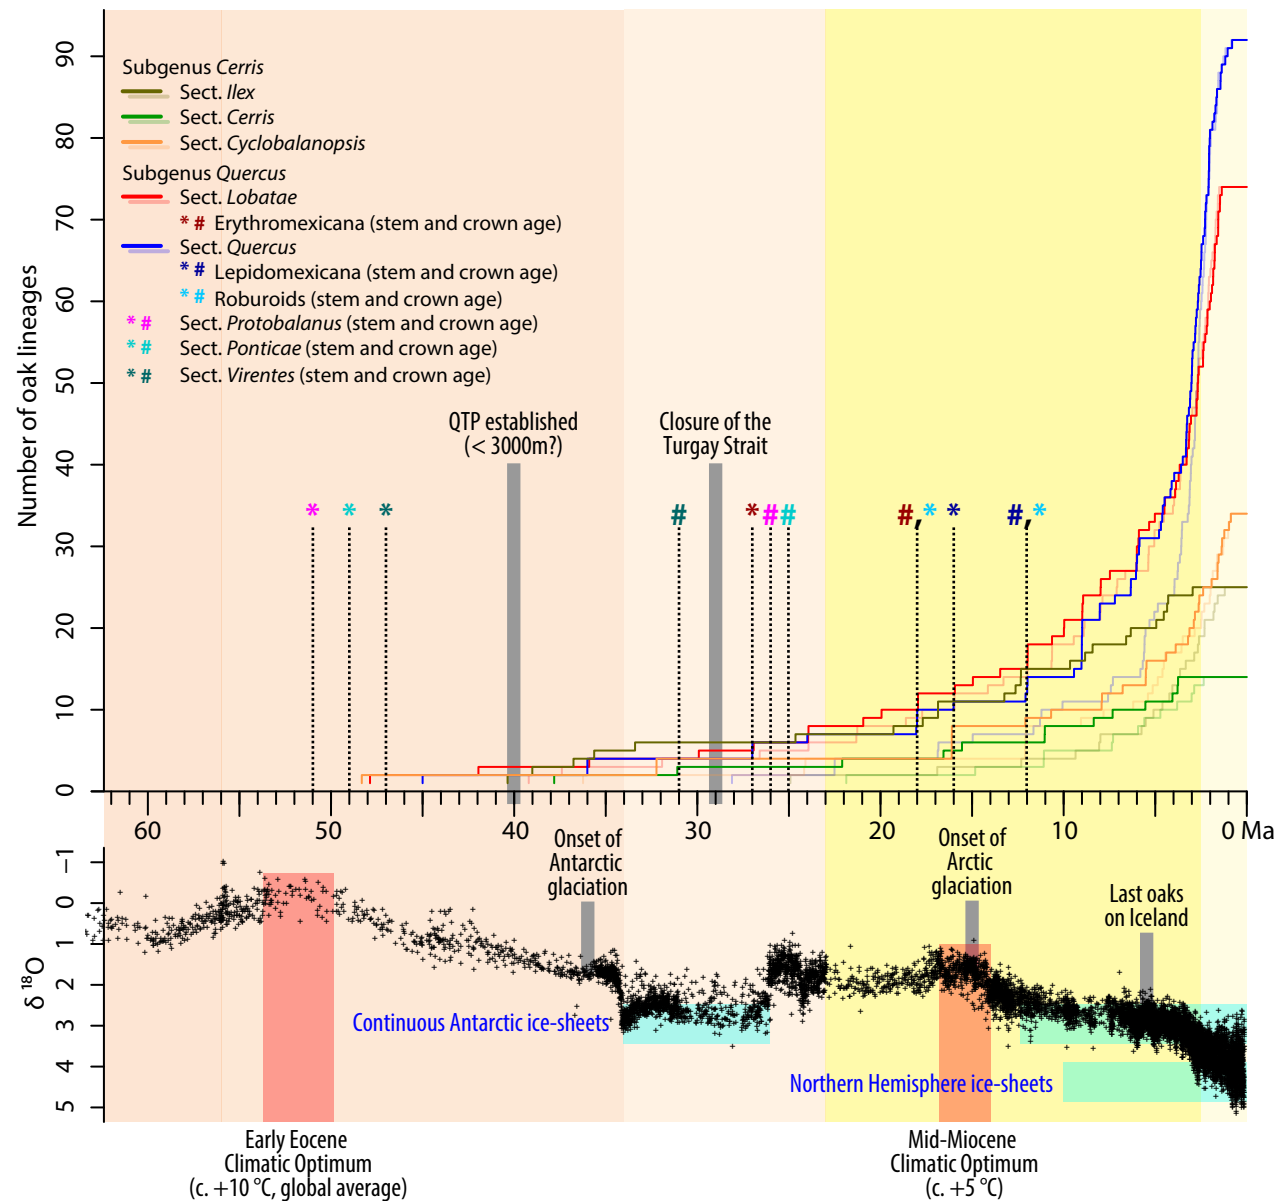

Number of RAD loci mapped to chromosome

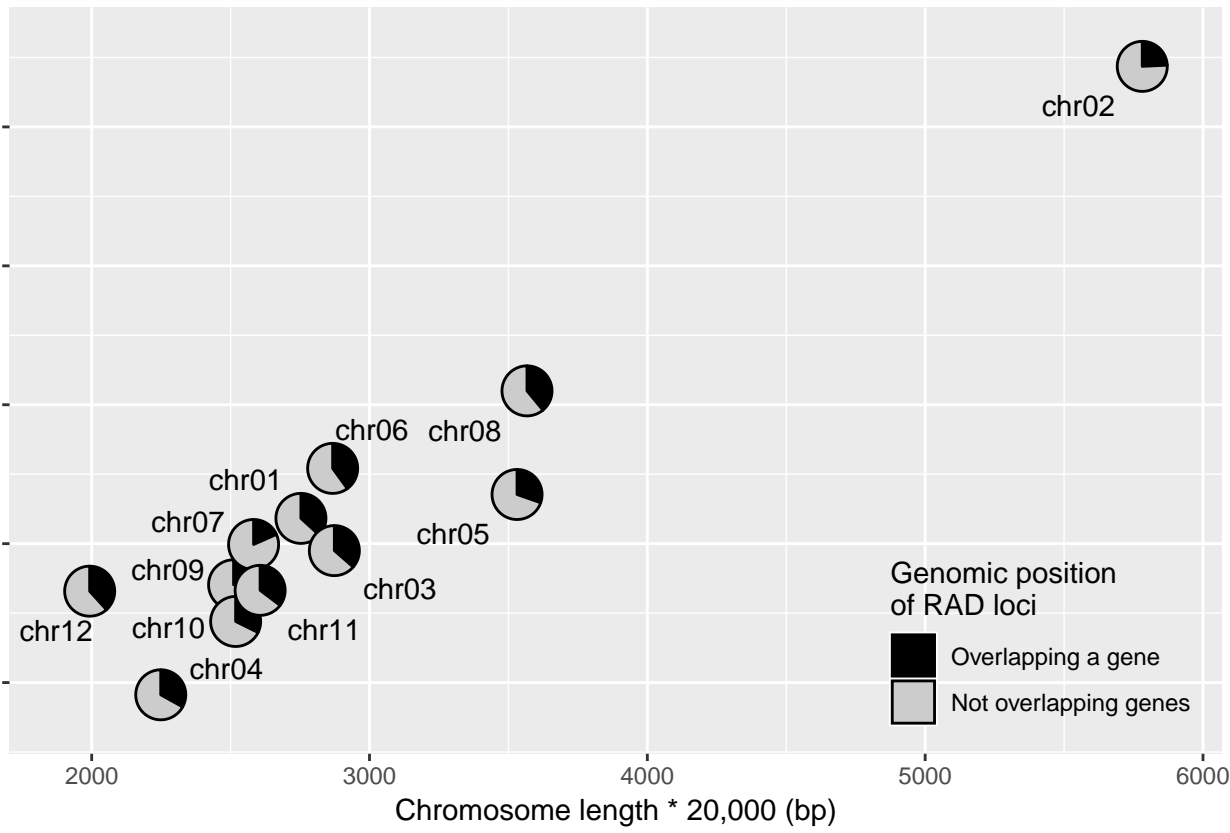

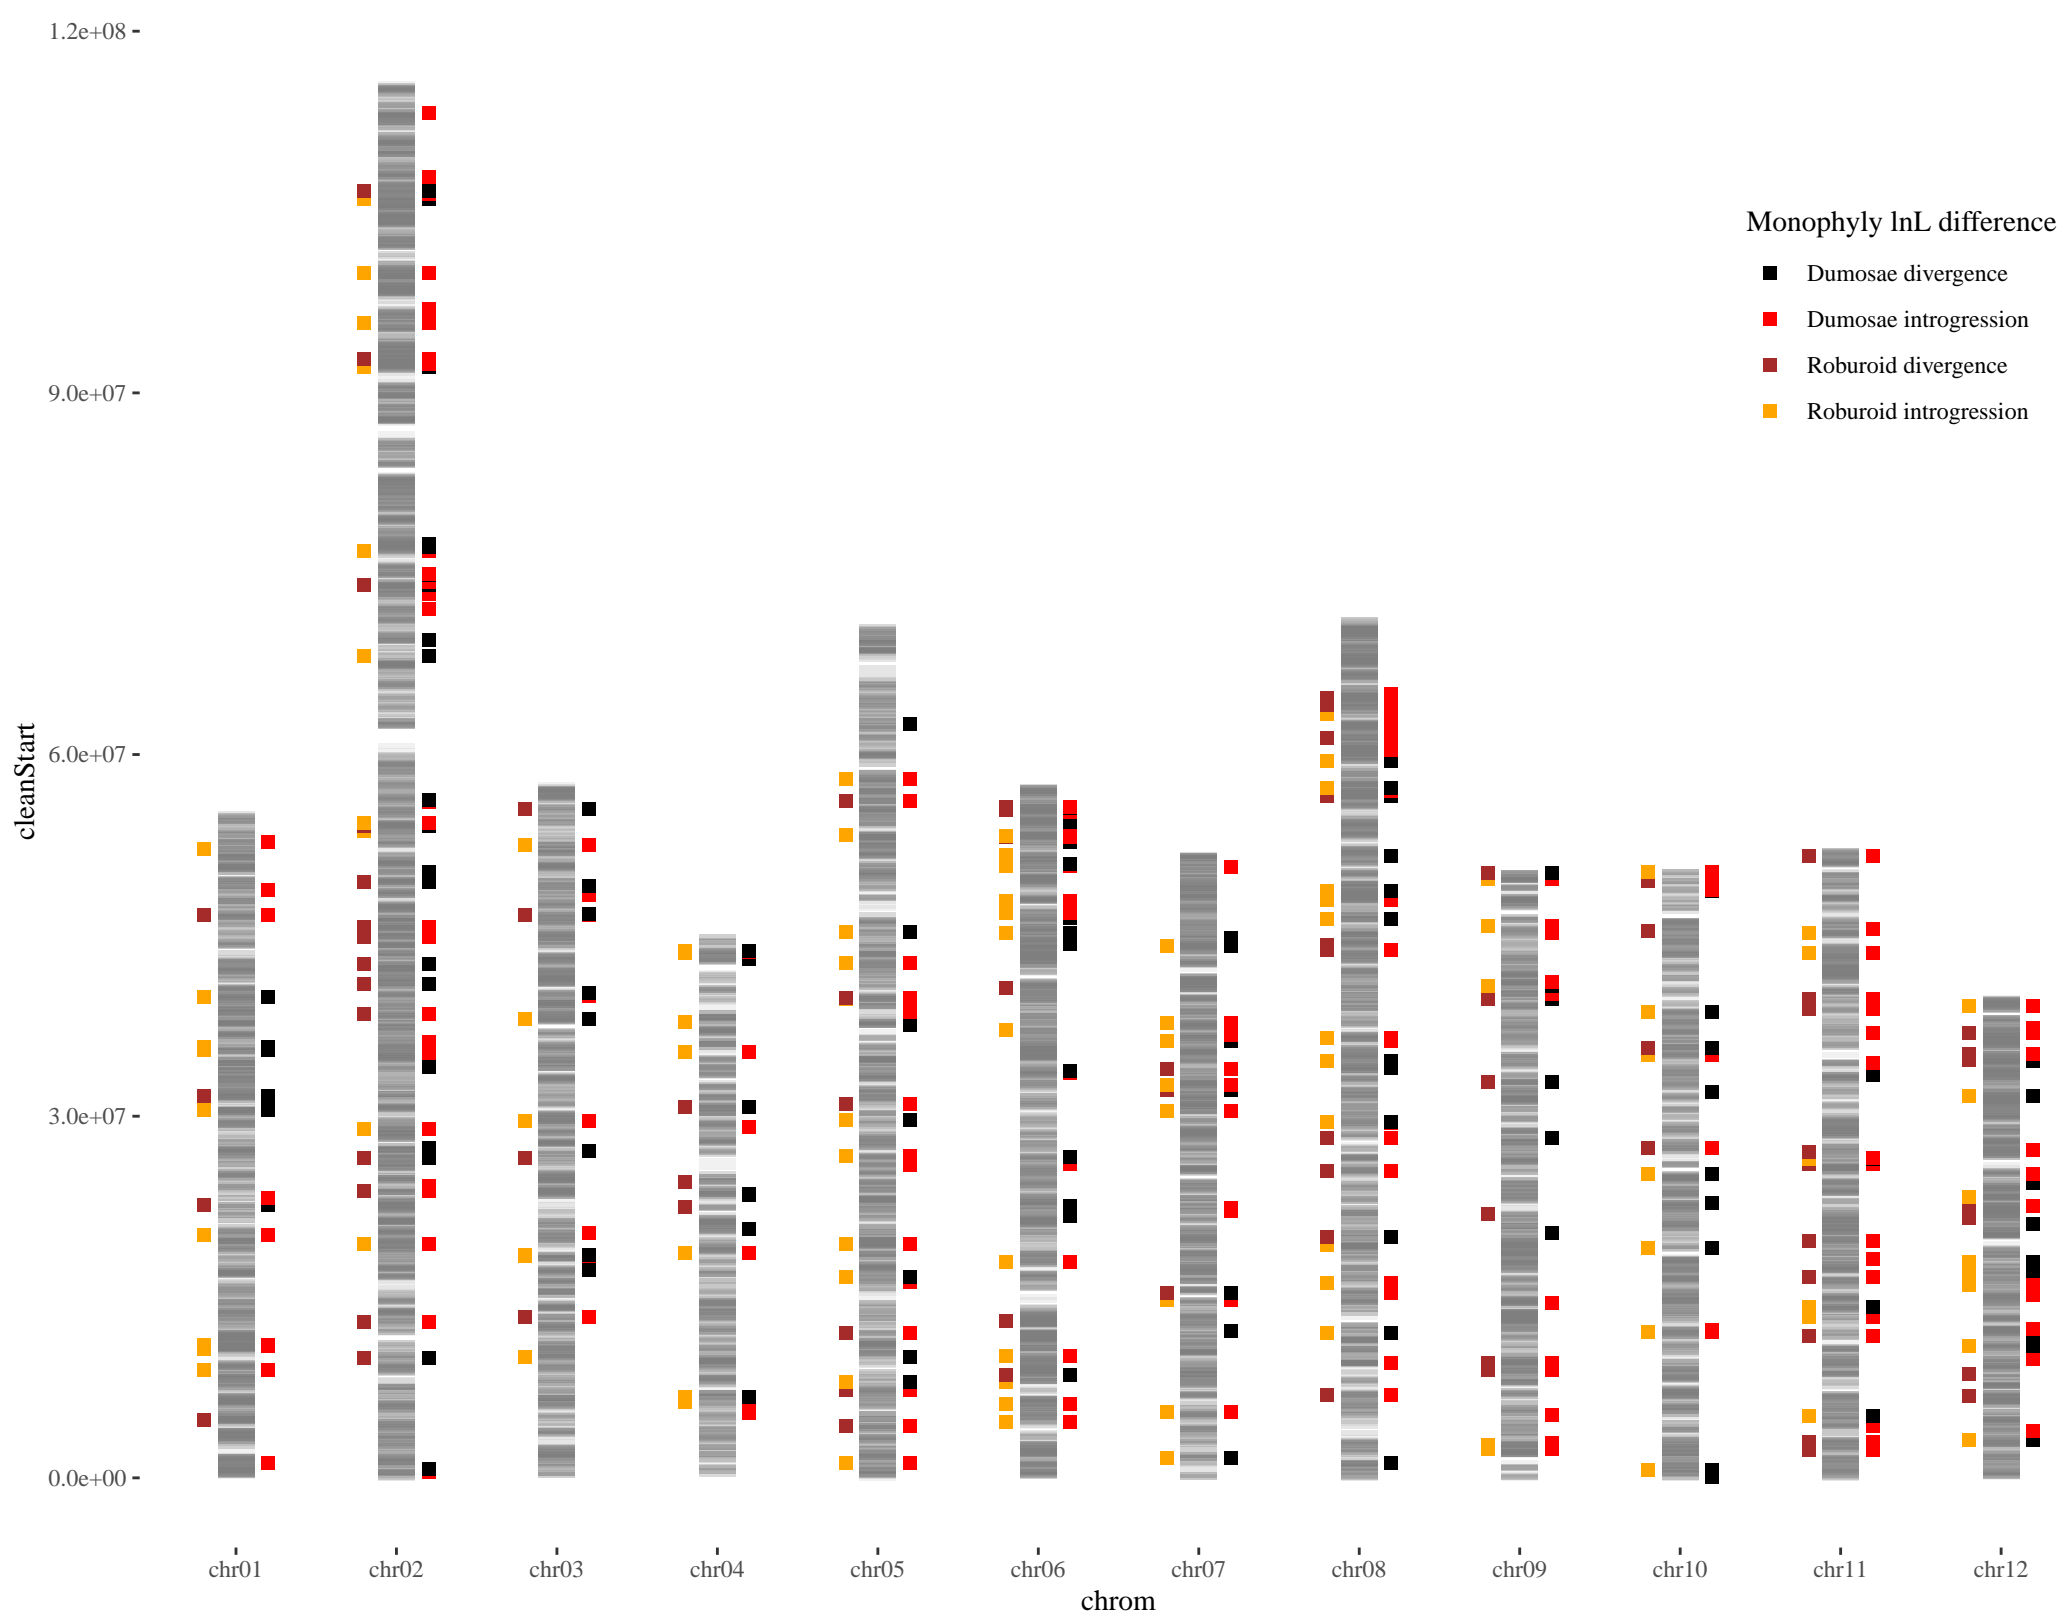



15. sect. Cyclobalanopsis -  
 14. sect. Ilex -  
 13. sect. Cerris -  
 12. Mexican red oaks -  
 11. Rubrae -  
 10. Laurifoliae -  
 09. sect. Lobatae -  
 08. Mexican white oaks -  
 07. Roburoid white oaks -  
 06. sect. Virentes -  
 05. sect. Protobalanus -  
 04. sect. Quercus -  
 03. subg. Cerris -  
 02. subg. Quercus -  
 01. Quercus -

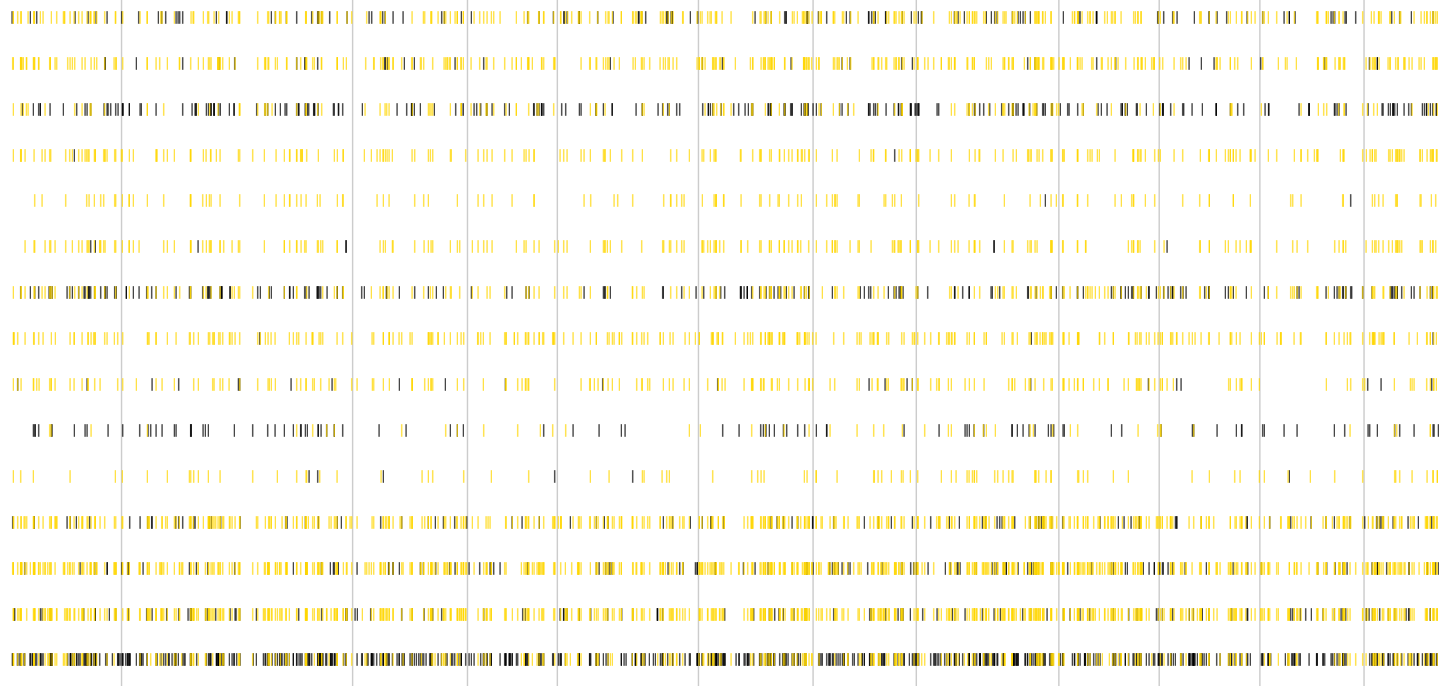

Node support

┆ concord

┆ conflict

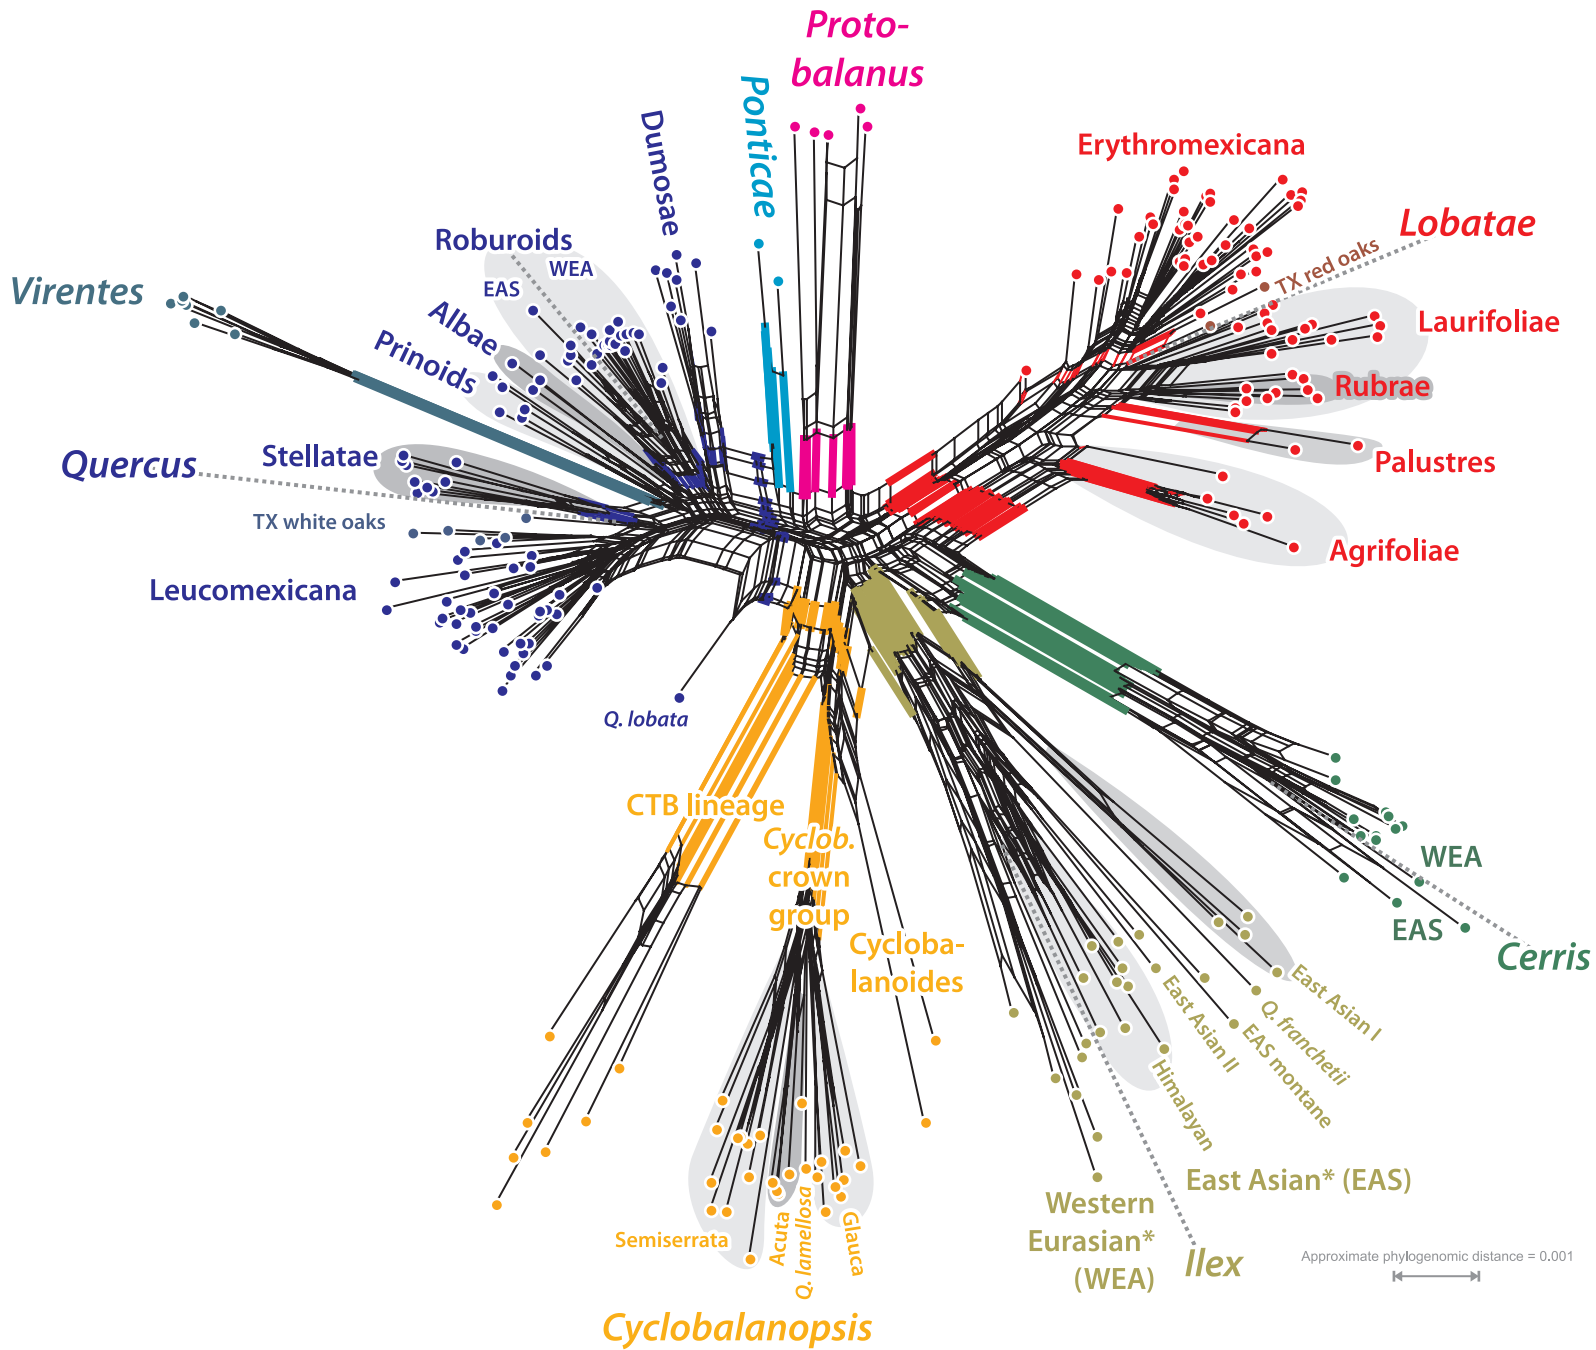

Source: https://www.biorxiv.org/content/10.1101/587253v1.full.pdf
