# Supplementary material for: Genomic landscape of the global oak phylogeny
Source: bioRxiv or medRxiv preprint supplement (doi:10.1101/587253), 2019-03-24

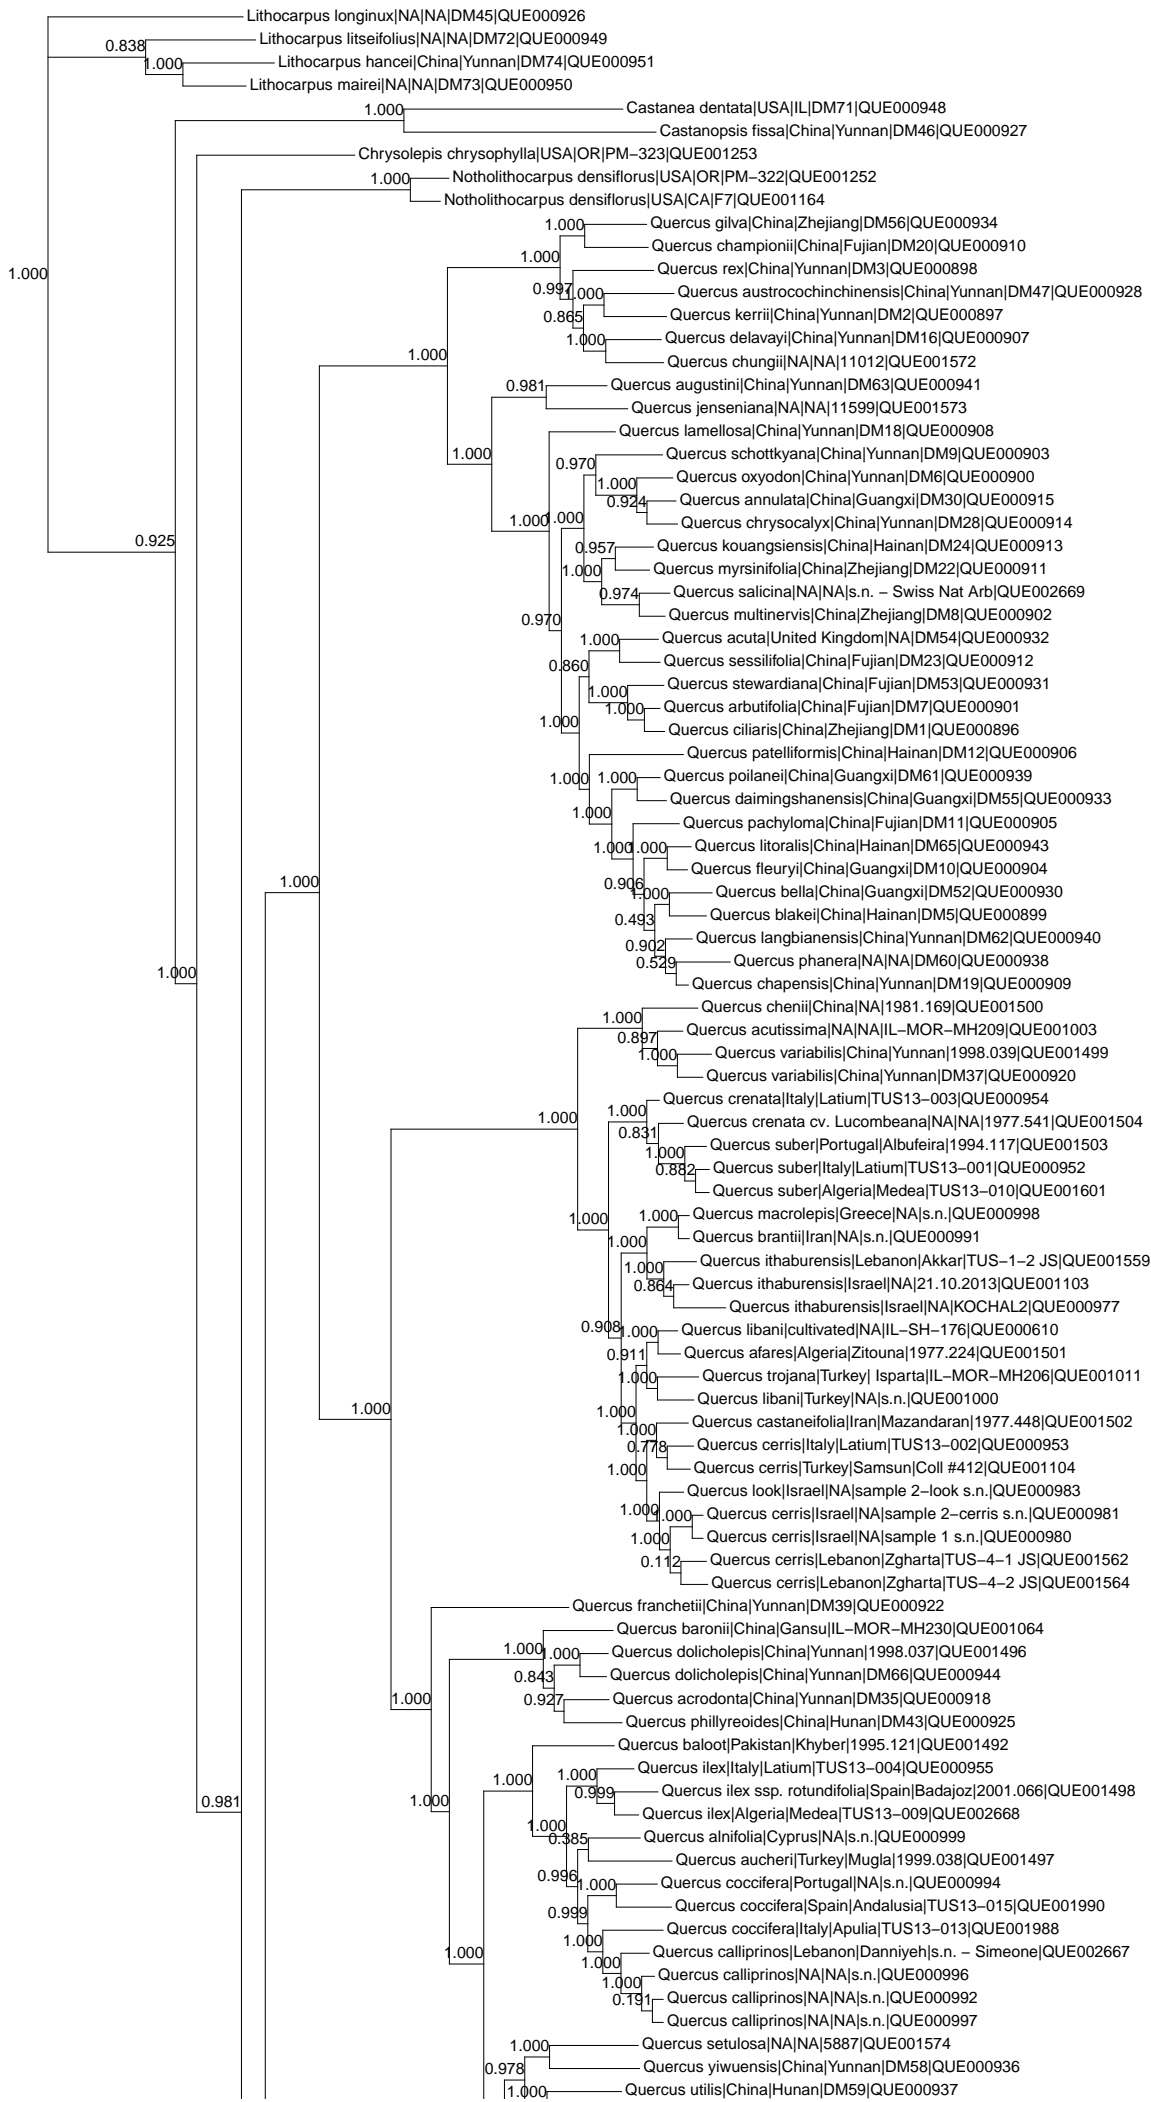

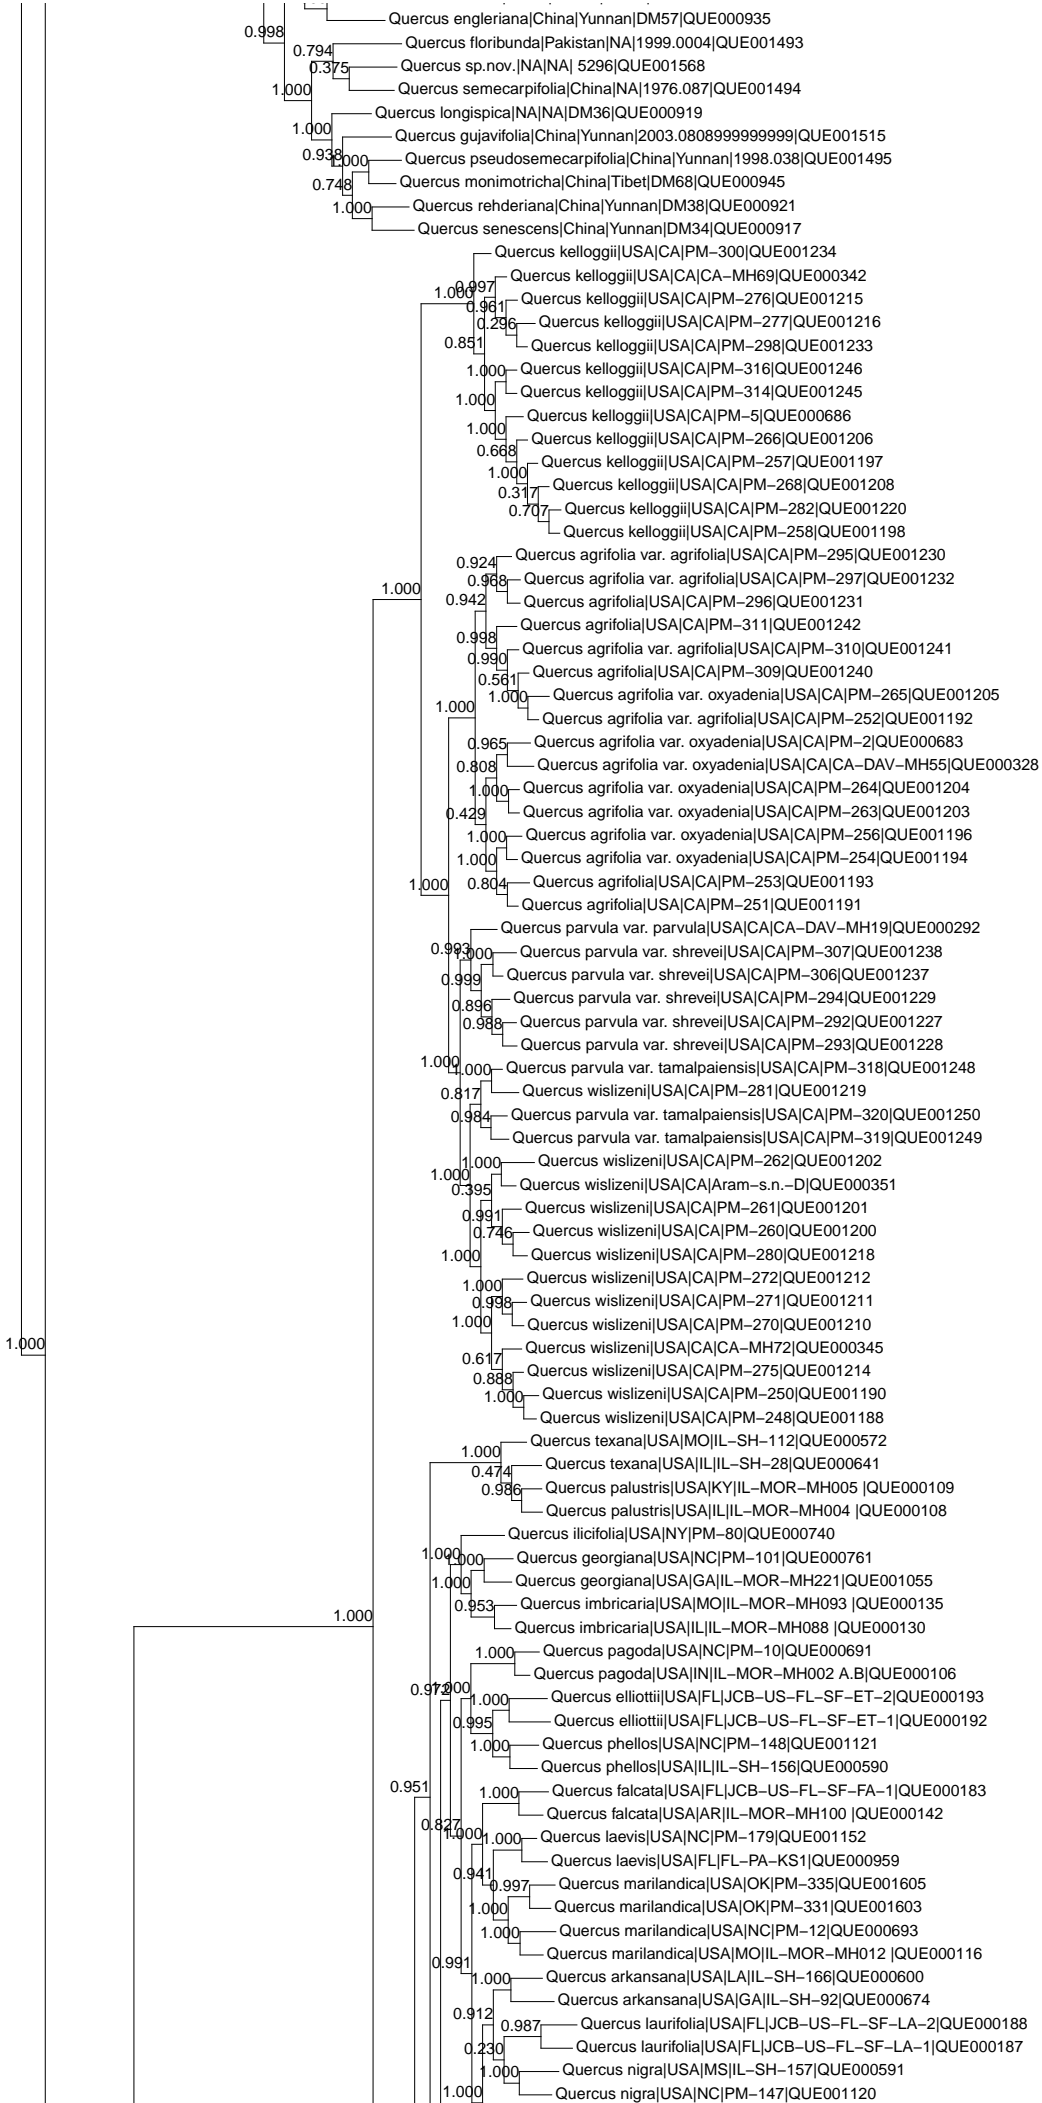

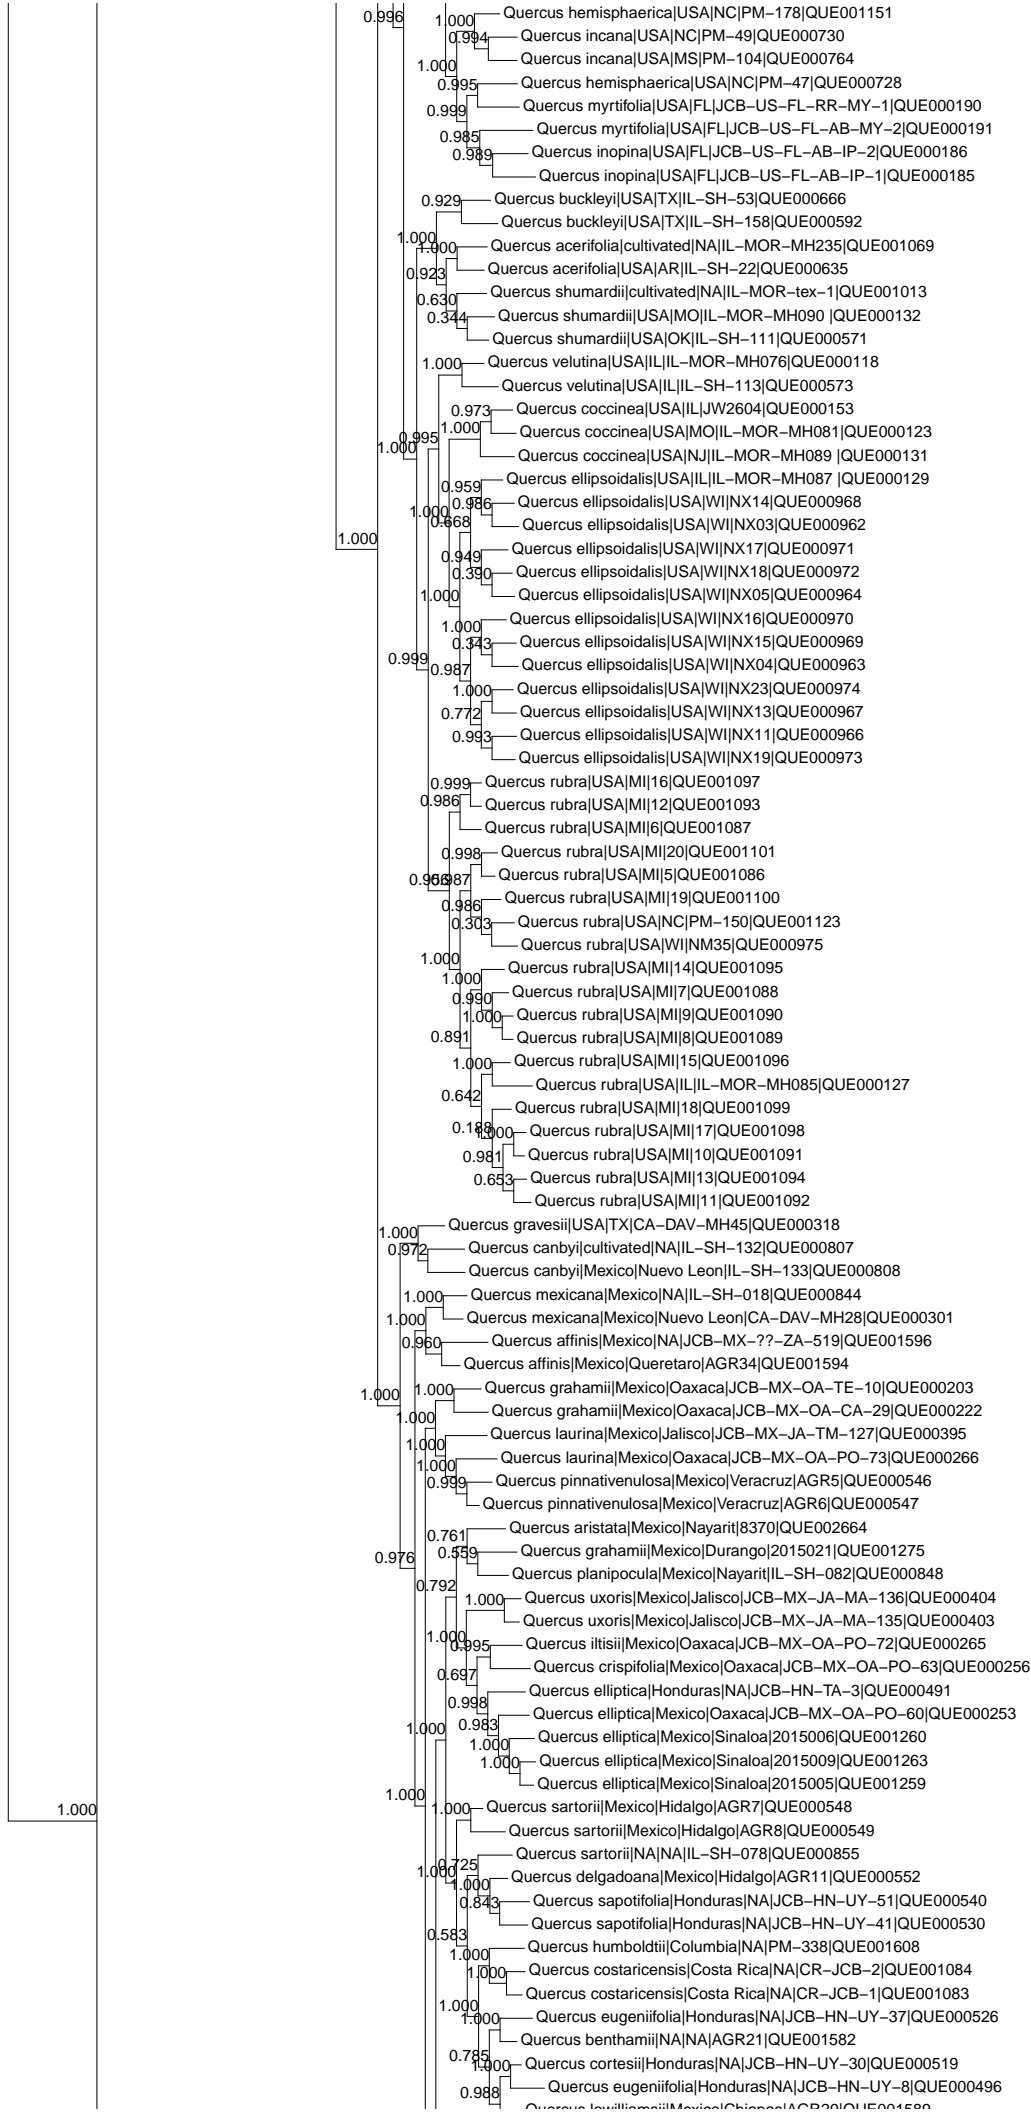

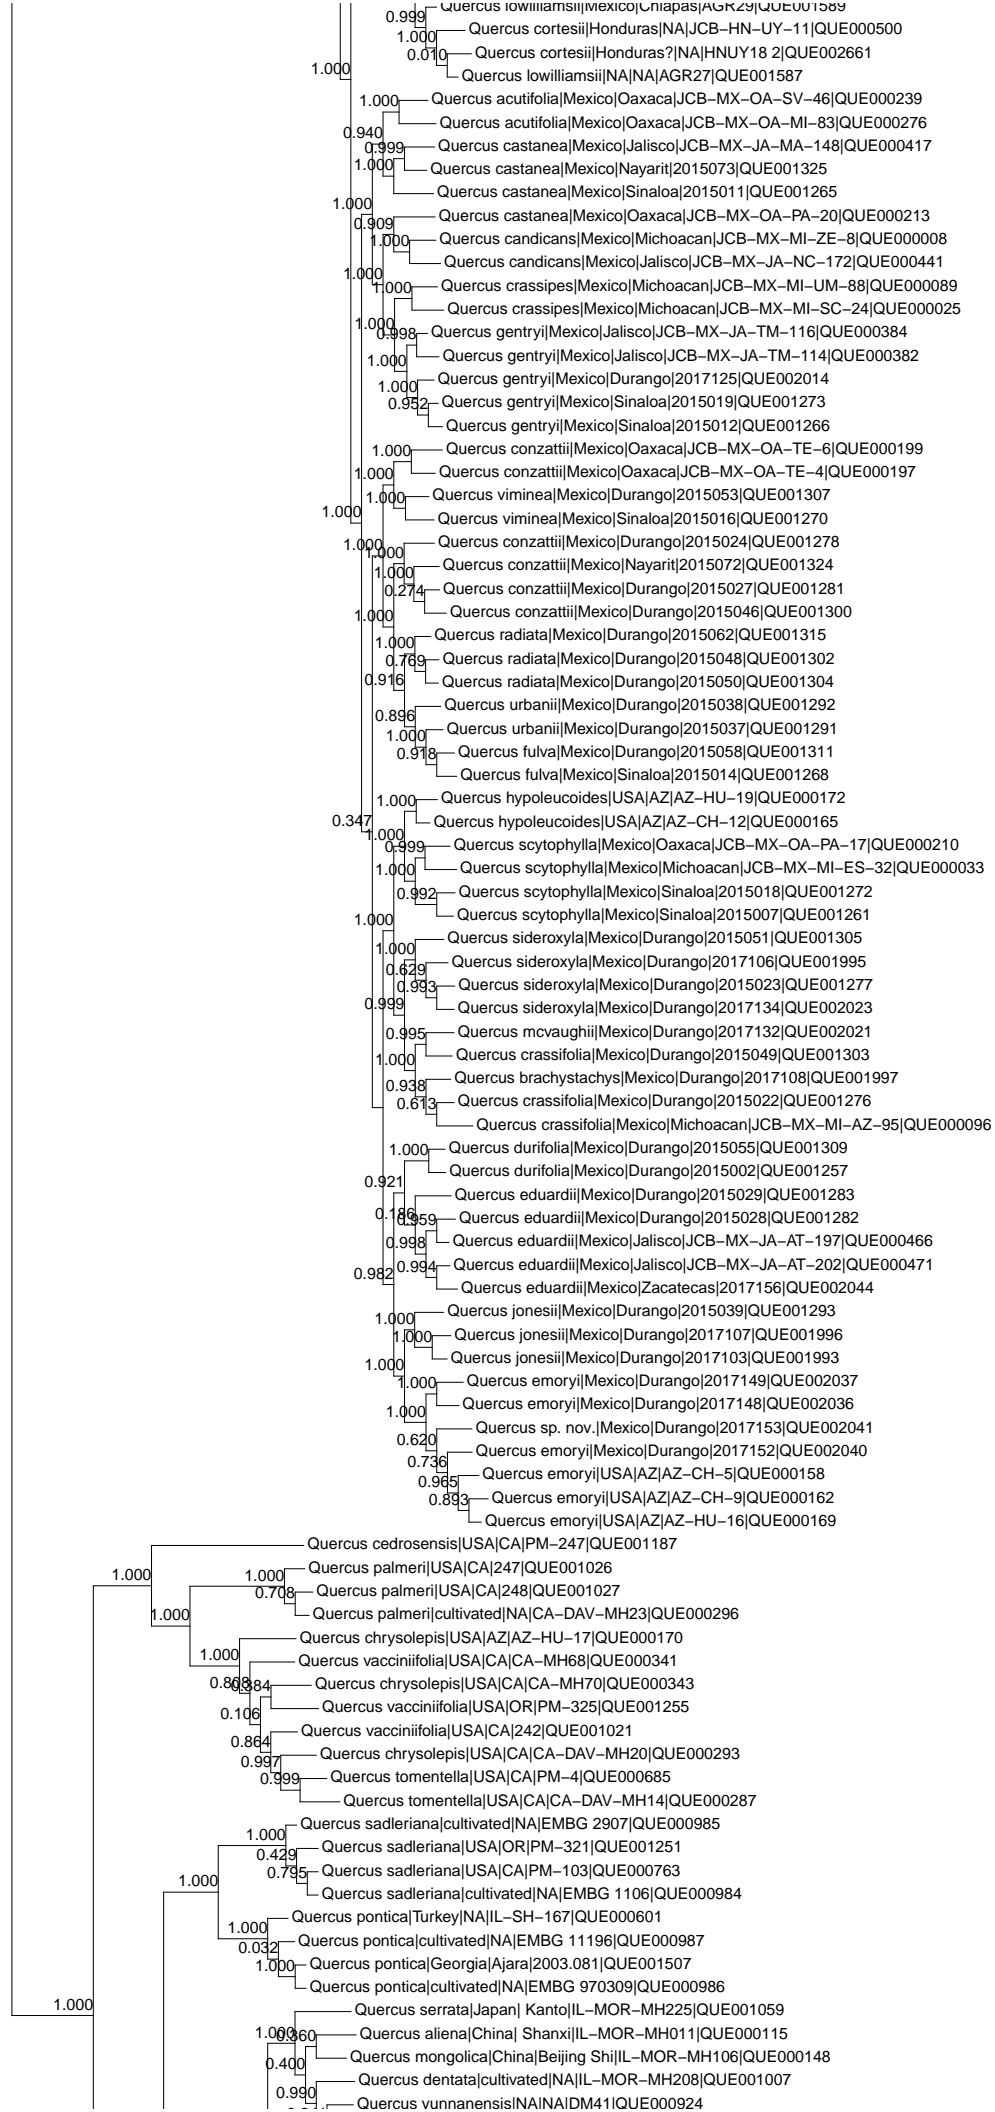



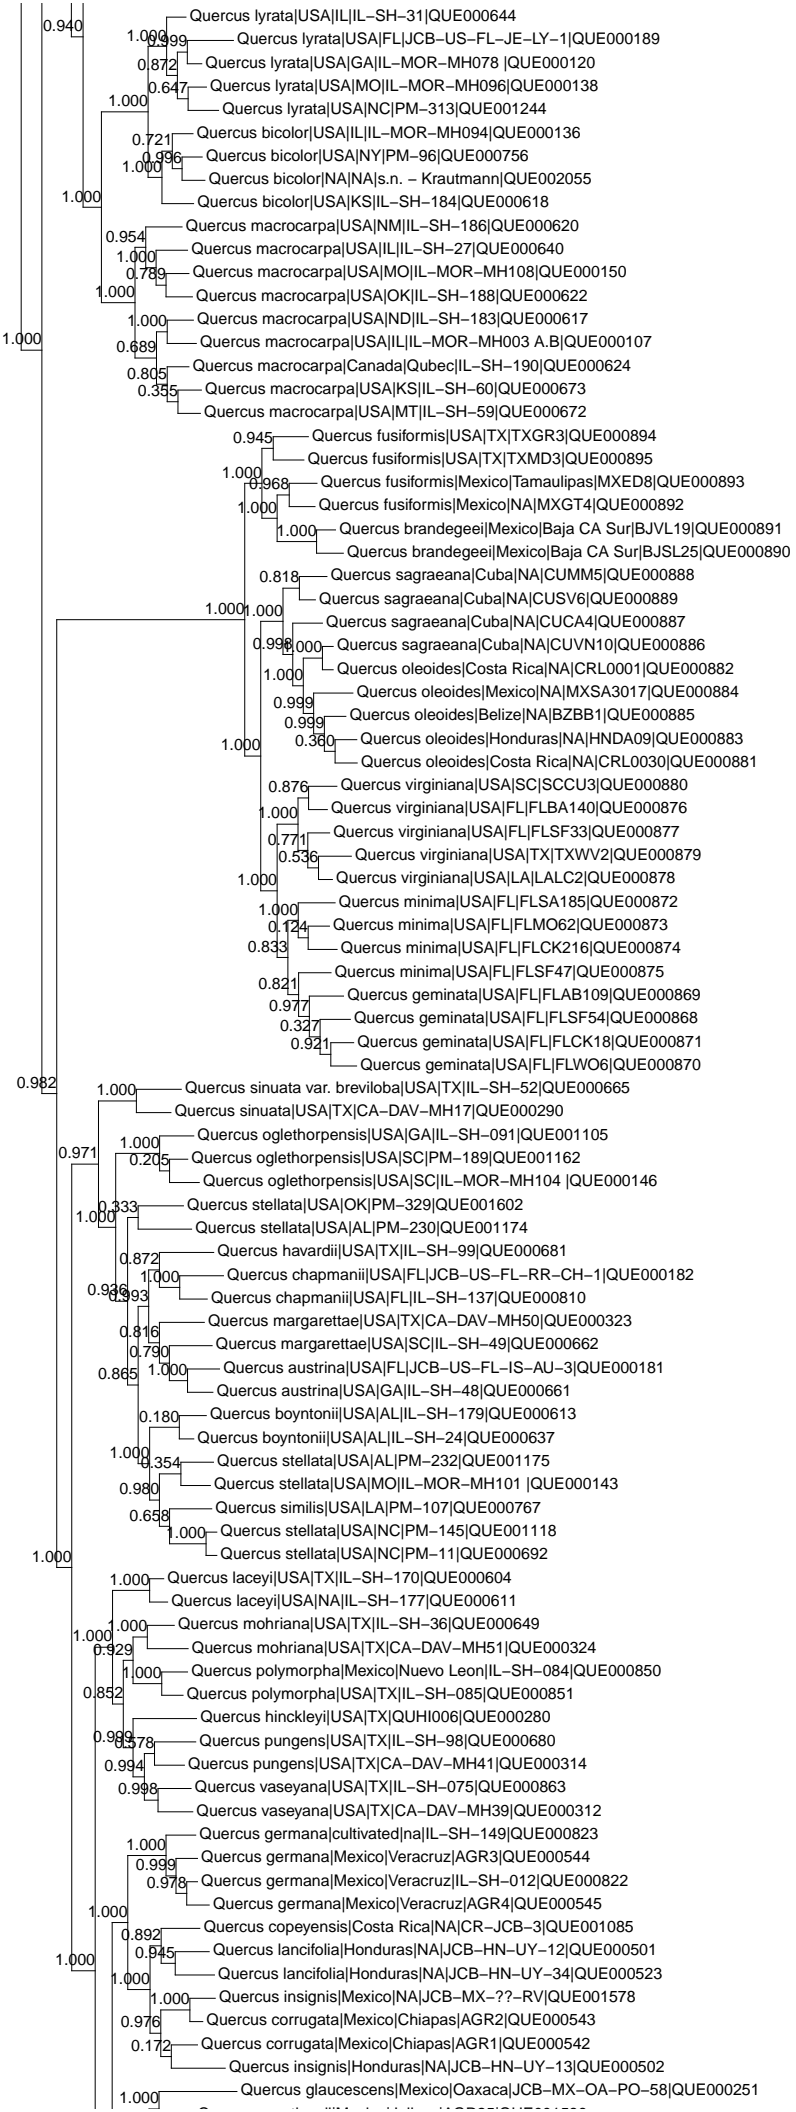

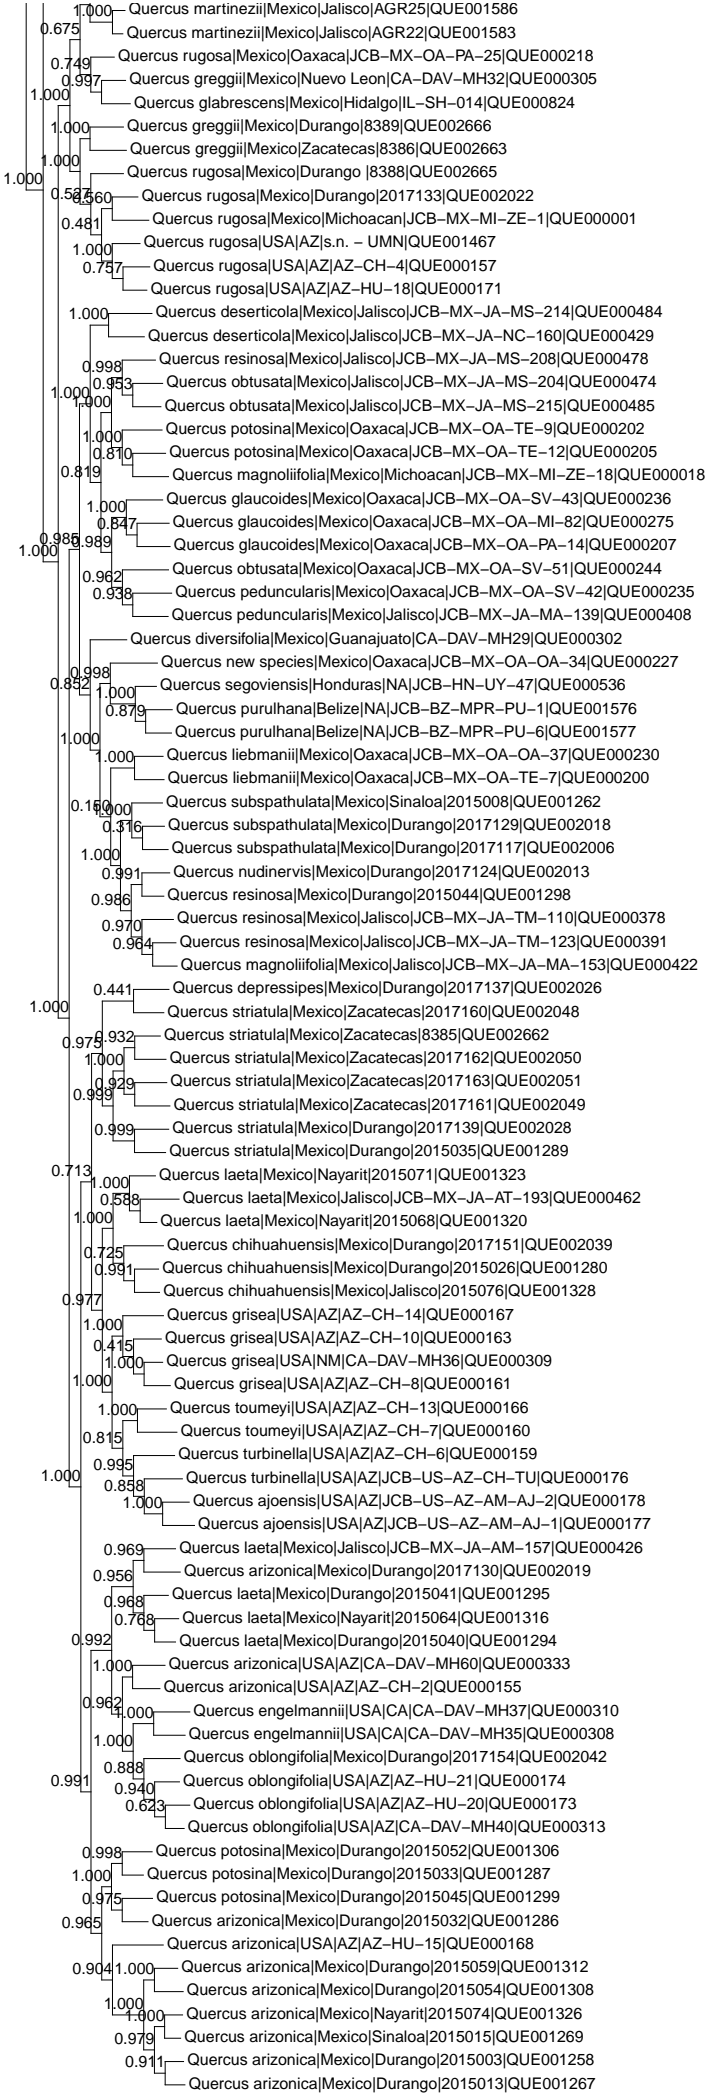

Supplement: Supplementary file [file media-3.pdf]
